# Supplementary material for: Nuclear activation in dual-durotaxing cells on a matrix with cell-scale stiffness-heterogeneity
Source: Research Square preprint supplement (doi:10.21203/rs.3.rs-1046986/v1), 2022-04-13
Supplement: Supplementary file 1 [file 73f0a50389738855b2dd3bb3.pdf]

## **Supplementary Information**

### **Nuclear activation in the dual-durotaxing cells on a matrix with cell-scale stiffness-heterogeneity**

Satoru Kidoaki<sup>1\*</sup>, Hiroyuki Ebata<sup>1</sup>, Kosuke Moriyama<sup>1</sup>, Thasaneeya Kuboki<sup>1</sup>, Yukie Tsuji<sup>1</sup>, Rumi Sawada<sup>2</sup>, Saori Sasaki<sup>1</sup>, Tatsuya Okuda<sup>1</sup>, Kosuke Hamano<sup>3</sup>, Takahito Kawano<sup>1</sup>, Aki Yamamoto<sup>1</sup>, Ken Kono<sup>2</sup>, Kazusa Tanaka<sup>2</sup>

1: Laboratory of Biomedical and Biophysical Chemistry, Institute for Materials Chemistry and Engineering, Kyushu University, CE41-204, 744 Motooka, Nishi-Ku, Fukuoka 819-0395, Japan.

2: Division of Cell-Based Therapeutic Products, National Institute of Health Sciences, Japan.

3: Graduate School of Engineering, Kyushu University, Japan.

\*Correspondence: kidoaki@ms.ifoc.kyushu-u.ac.jp

## Supplementary Information

### Supplementary Figures

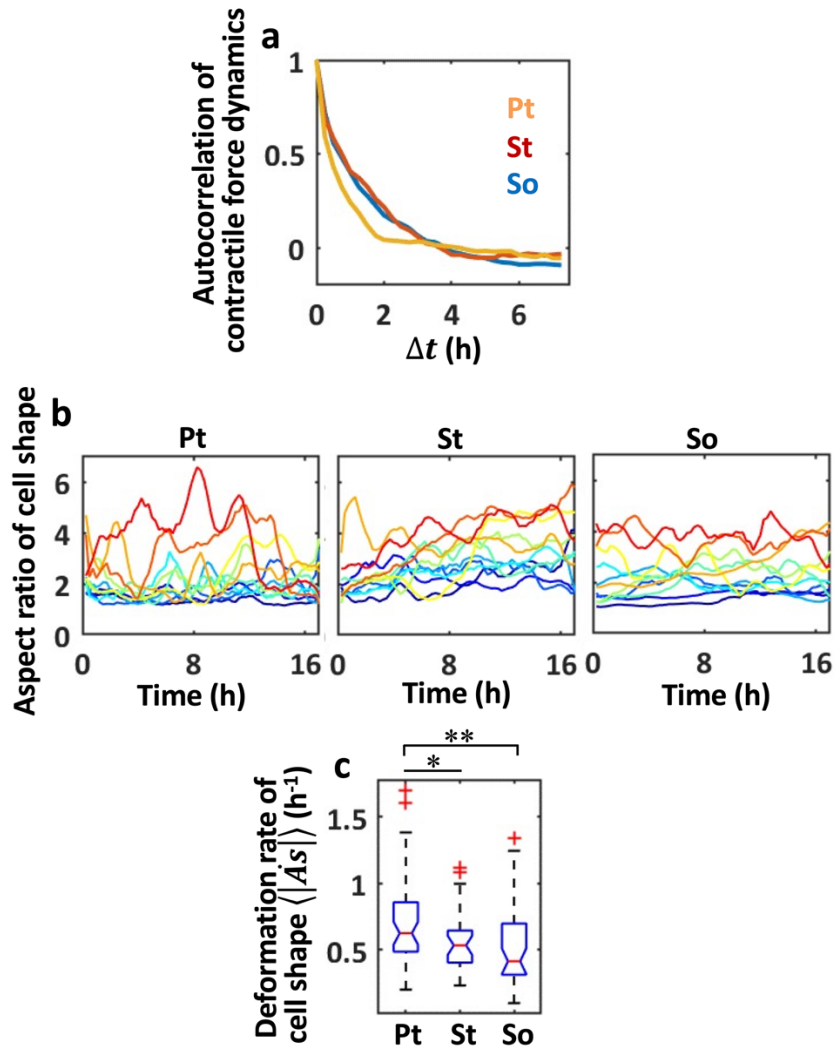

**Figure S1. Analysis of dynamics in contractile force and shape of the cells cultured on Pt, St, and So gels. (a)** Autocorrelation function of time variation of contractile forces described in Fig. 1i. Correlation time  $\tau_f$  in Fig. 1j was determined from these data. **(b)** Representative time variation of the aspect ratio of cell shape.  $n=11$  for Pt, St, and So. **(c)** Deformation rate of cell shape calculated from (b). The intensity of fluctuation of cell shape was highest in dual-durotaxing cells on the Pt gels.  $n= 46$  (Pt), 28 (St), 39 (So). \*\*:  $P<0.01$ . \*:  $P<0.05$ .

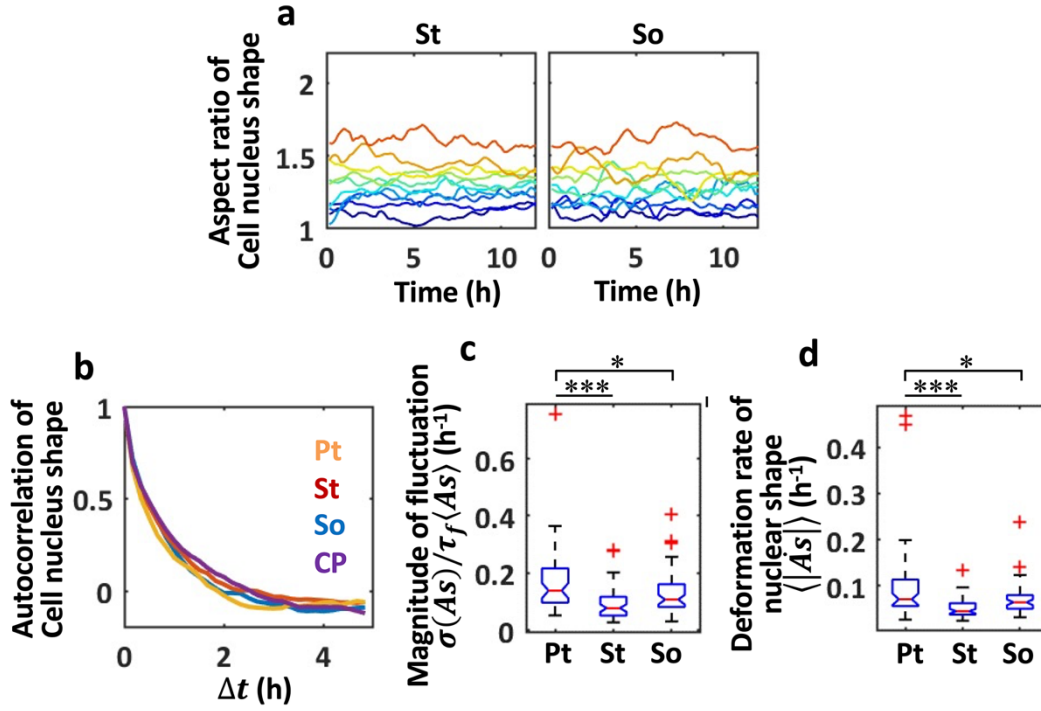

**Figure S2. Analysis of dynamics in nuclear shape of cells cultured on Pt, St and So gels, and on CP.** (a) Representative time variation of the aspect ratio of the cell nucleus on St and So gels.  $n=10$  for St and So. (b) Autocorrelation functions of the time variation of nuclear shape described in Fig. 2a and Fig. S2a. (c, d) The magnitude of fluctuation (c) and the deformation rate (d) in the nuclear shaping fluctuations. The degree of fluctuation and the deformation rate of nuclear shape were defined as the ratio of normalized standard deviation to correlation time, and the time derivative of fluctuation, respectively. \*\*\*:  $P < 0.001$ . \*:  $P < 0.05$ .  $n = 51$  (Pt),  $59$  (St),  $56$  (So).

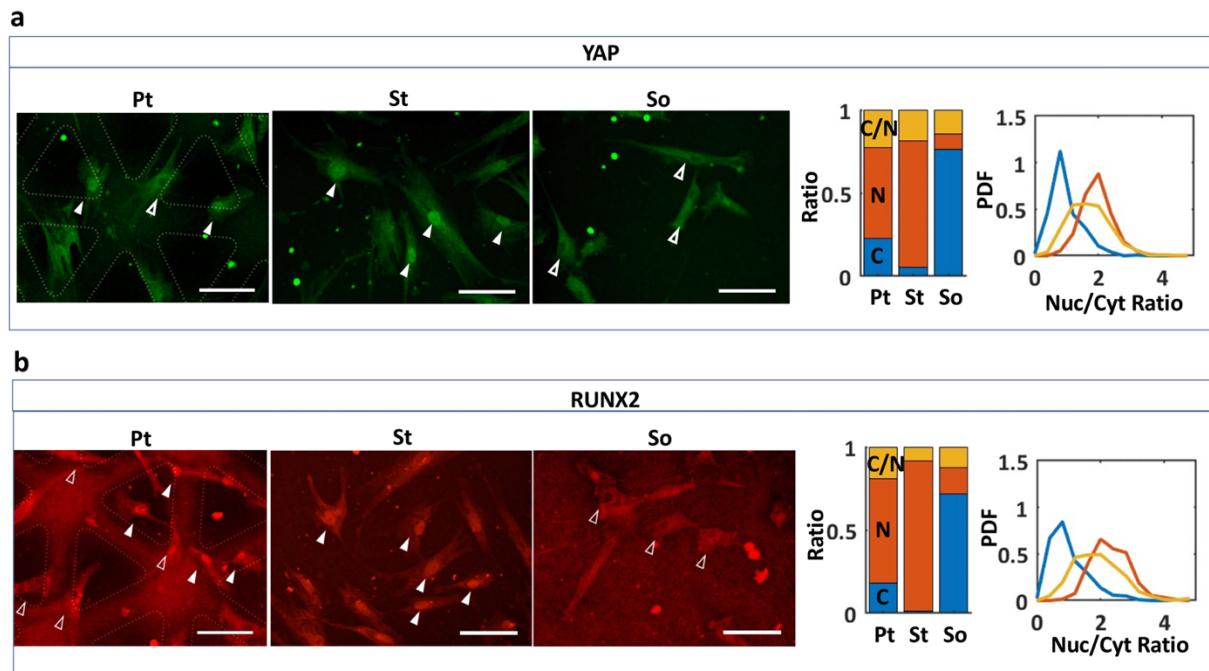

**Figure S3. Intracellular localization of YAP (a) and RUNX2 (b) in cells cultured on Pt, St, and So gels.** **Left:** immunofluorescence microscopic images. Solid arrows; nuclear localization. Open arrows; cytoplasmic localization. Scale bars: 100  $\mu$ m. **Middle:** cellular ratio measured for cytoplasmic localization (C), nuclear localization (N), and cytoplasmic/nuclear co-localization (C/N).  $n = 497$  (Pt), 314 (St), 384 (So). **Right:** probability density functions of the ratio of nuclear to cytoplasmic localization.

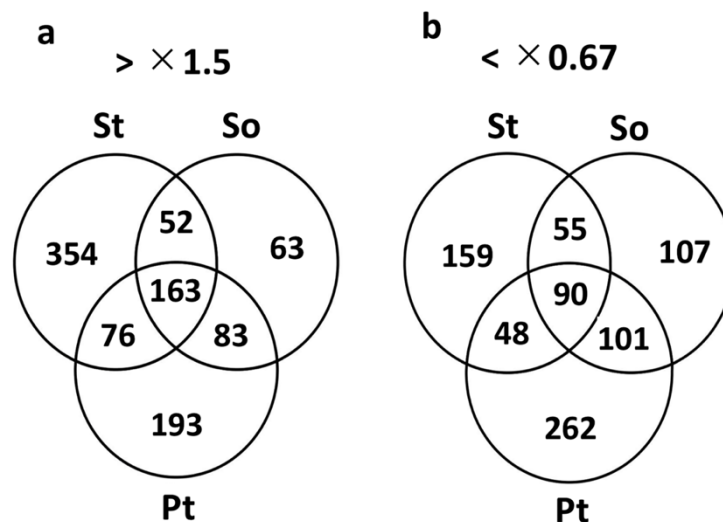

**Figure S4. Venn diagrams of up-regulated (a;  $>1.5$ -fold relative to CP) and down-regulated (b;  $<0.67$ -fold relative to CP) genes analyzed by DNA microarrays with cells cultured on Pt, St, and So gels.**



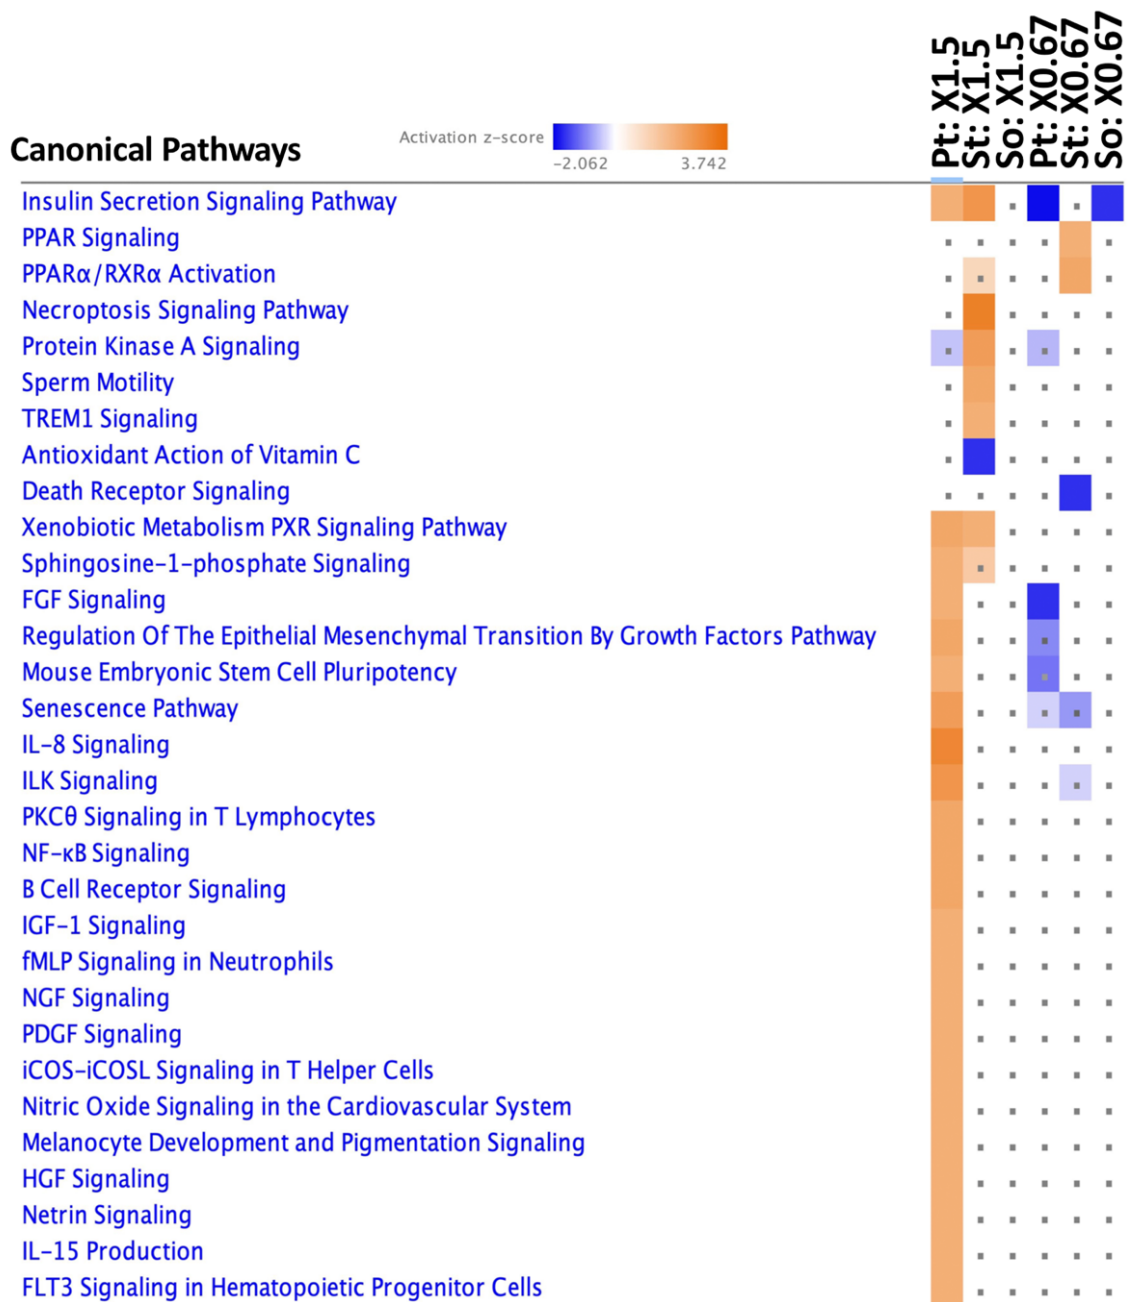

© 2000-2020 QIAGEN. All rights reserved.

**Figure S5. Comparison of the representative canonical pathways predicted to be activated or inactivated based on each expression profile in the DNA microarray data observed in cells cultured on Pt, St, and So gels.** Generated by IPA software. Grey dots show insignificant with  $P > 0.05$ .

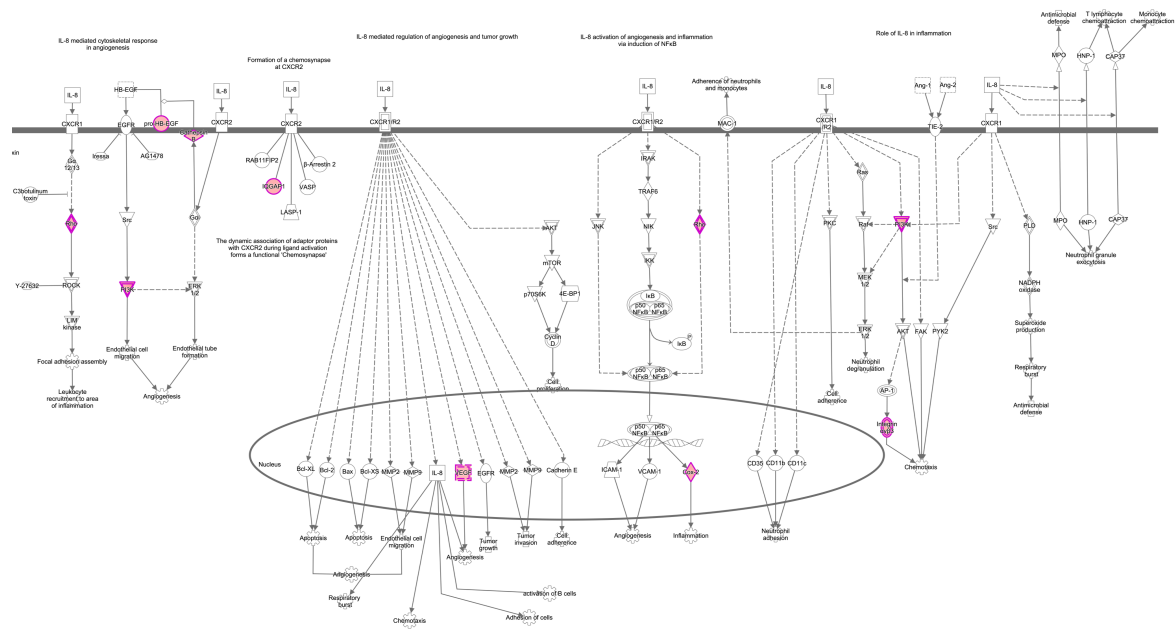

© 2000-2020 QIAGEN. All rights reserved.

**Figure S6a. IL-8 signaling pathway map including the observed up-regulated genes (highlighted in pink).**

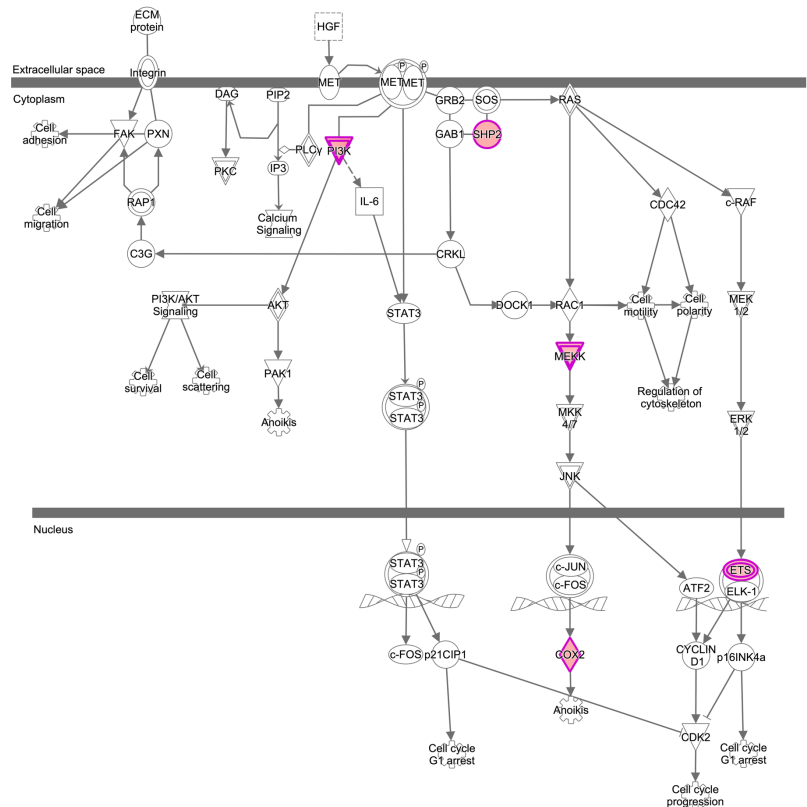

© 2000-2020 QIAGEN. All rights reserved.

**Figure S6b. HGF signaling pathway map including the observed up-regulated genes (highlighted in pink).**

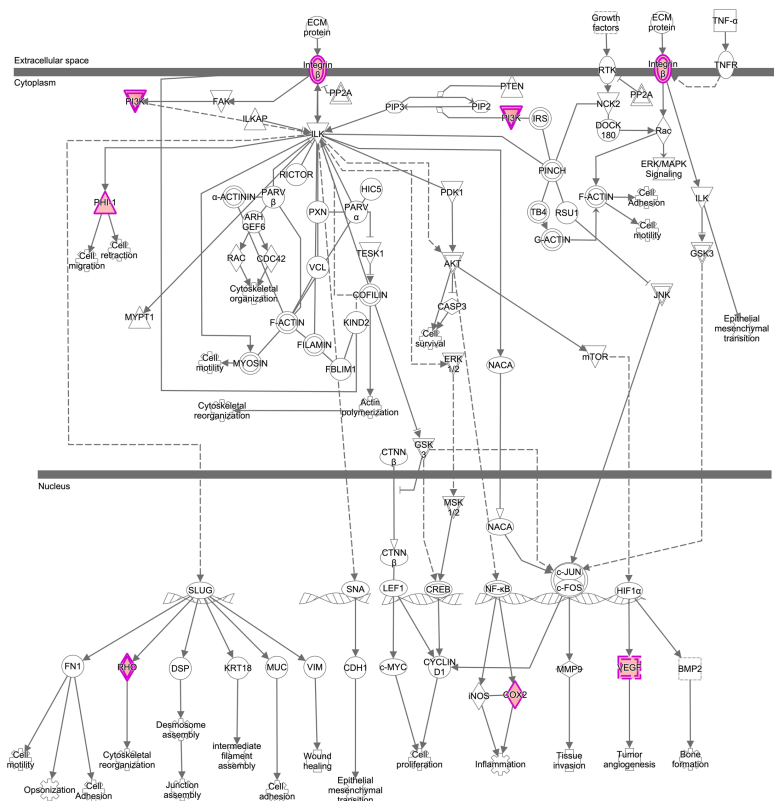

© 2000-2020 QIAGEN. All rights reserved.

**Figure S6c. ILK signaling pathway map including the observed up-regulated genes (highlighted in pink).**

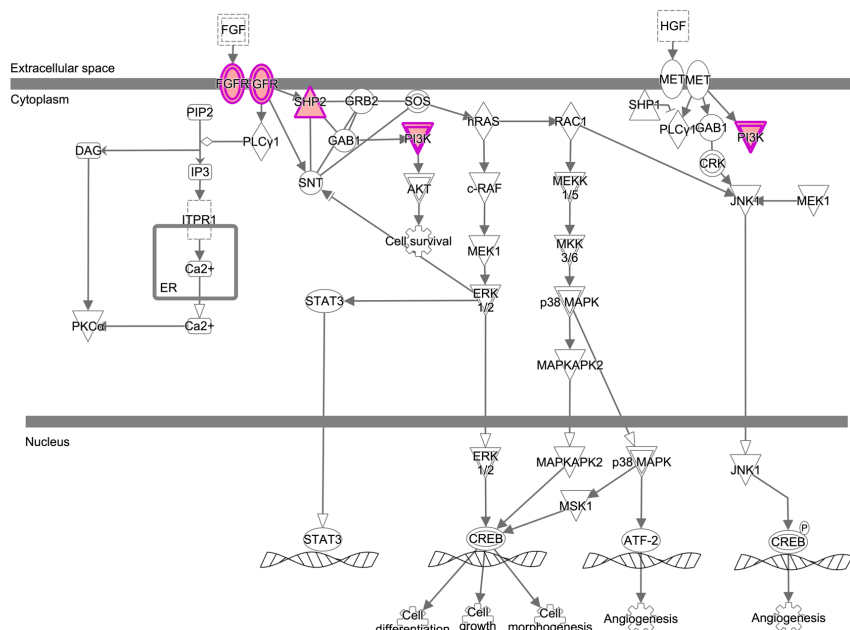

© 2000-2020 QIAGEN. All rights reserved.

**Figure S6d. FGF signaling pathway map including the observed up-regulated genes (highlighted in pink).**

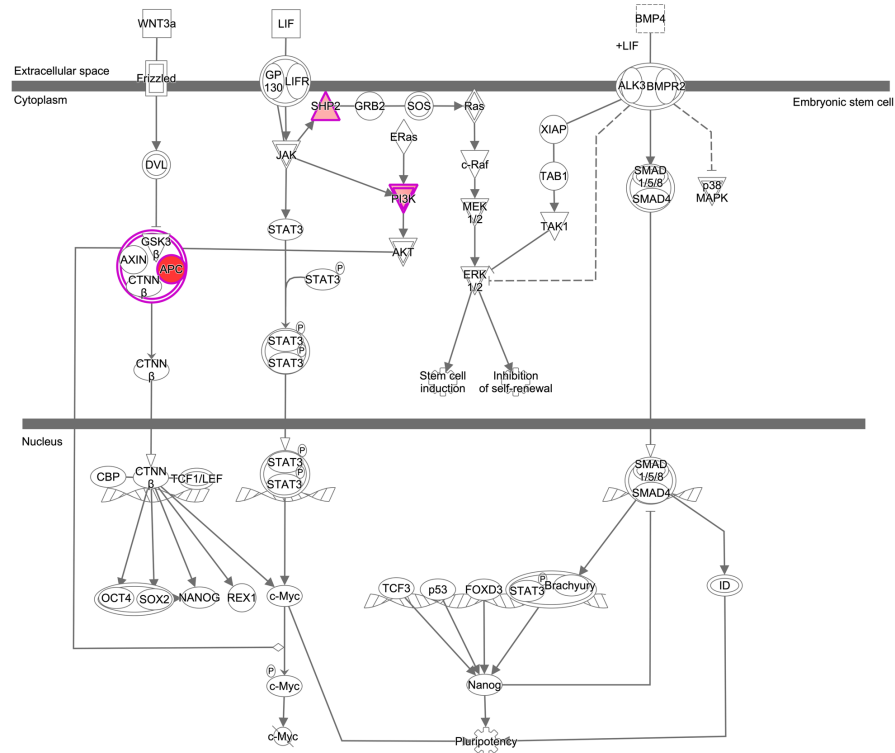

© 2000-2020 QIAGEN. All rights reserved.

**Figure S6e. Mouse embryonic stem cell pluripotency signaling pathway map including the observed up-regulated genes (highlighted in pink).**

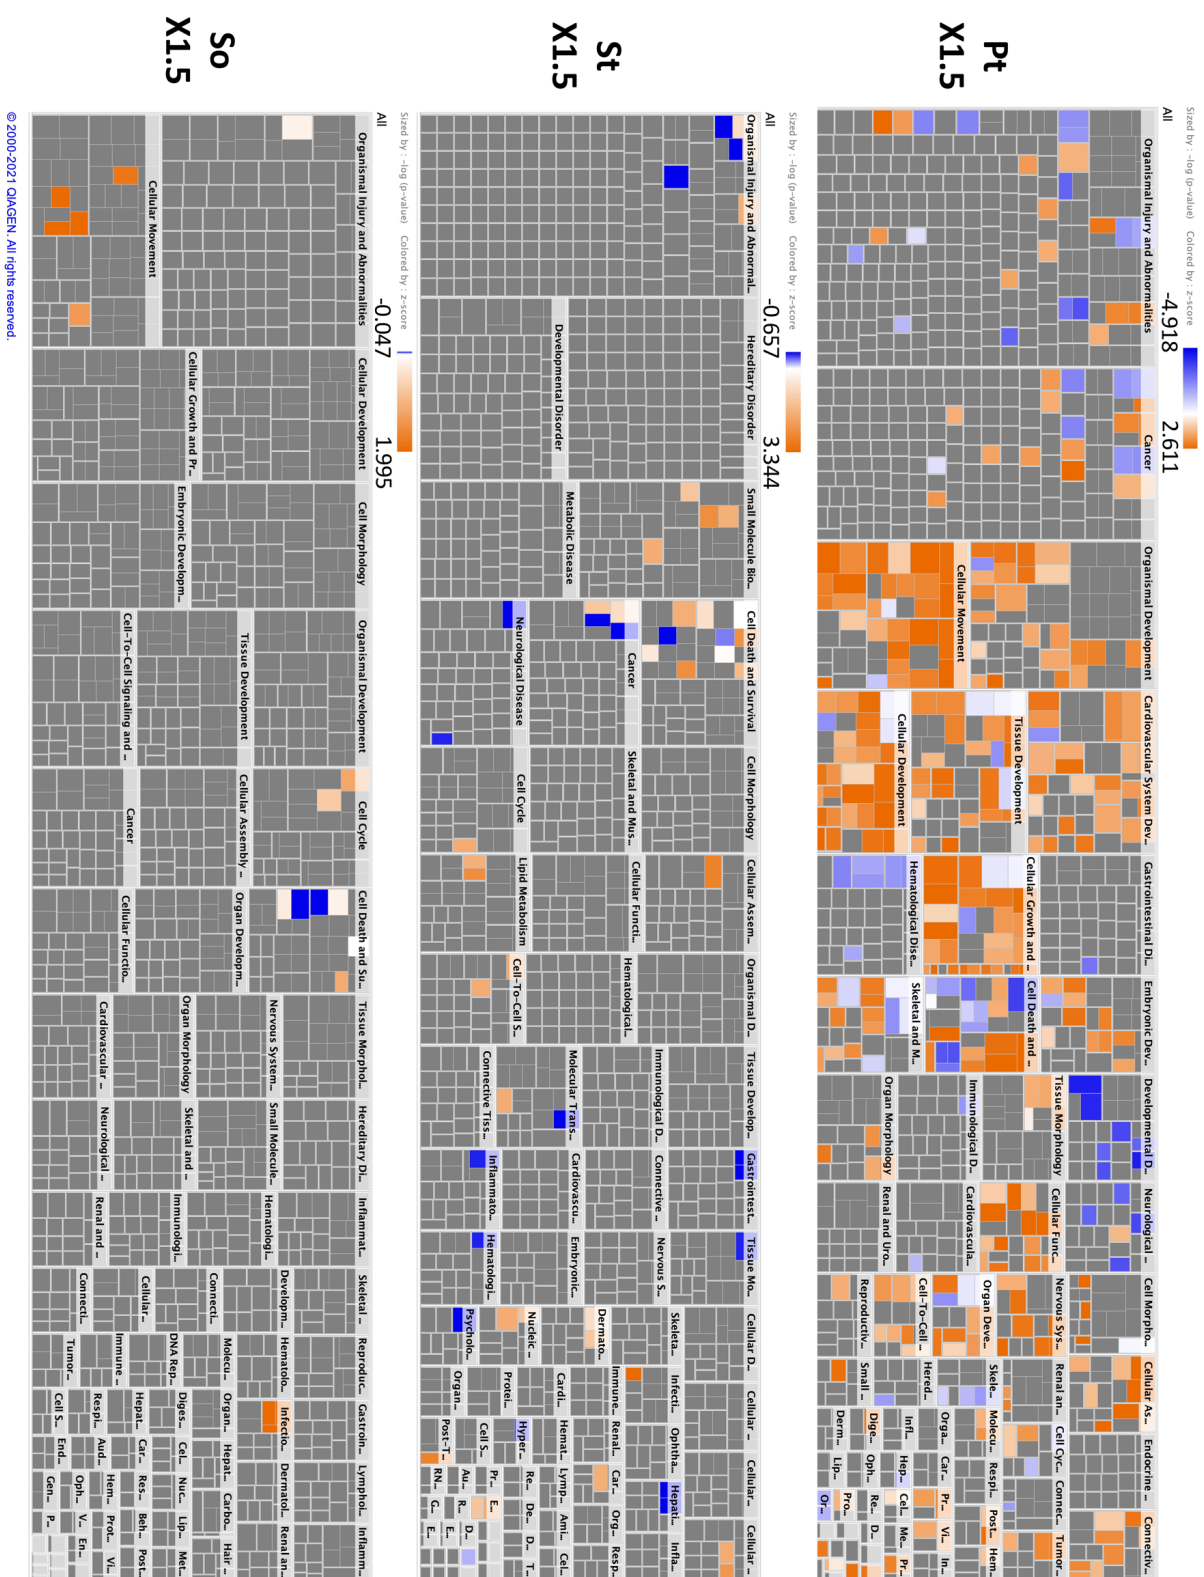

**Figure S7a.** Diagrams of biofunctions predicted to be activated or inactivated based on each up-regulated expression profile (>1.5-fold) in the DNA microarray data observed in cells cultured on Pt, St, and So gels.







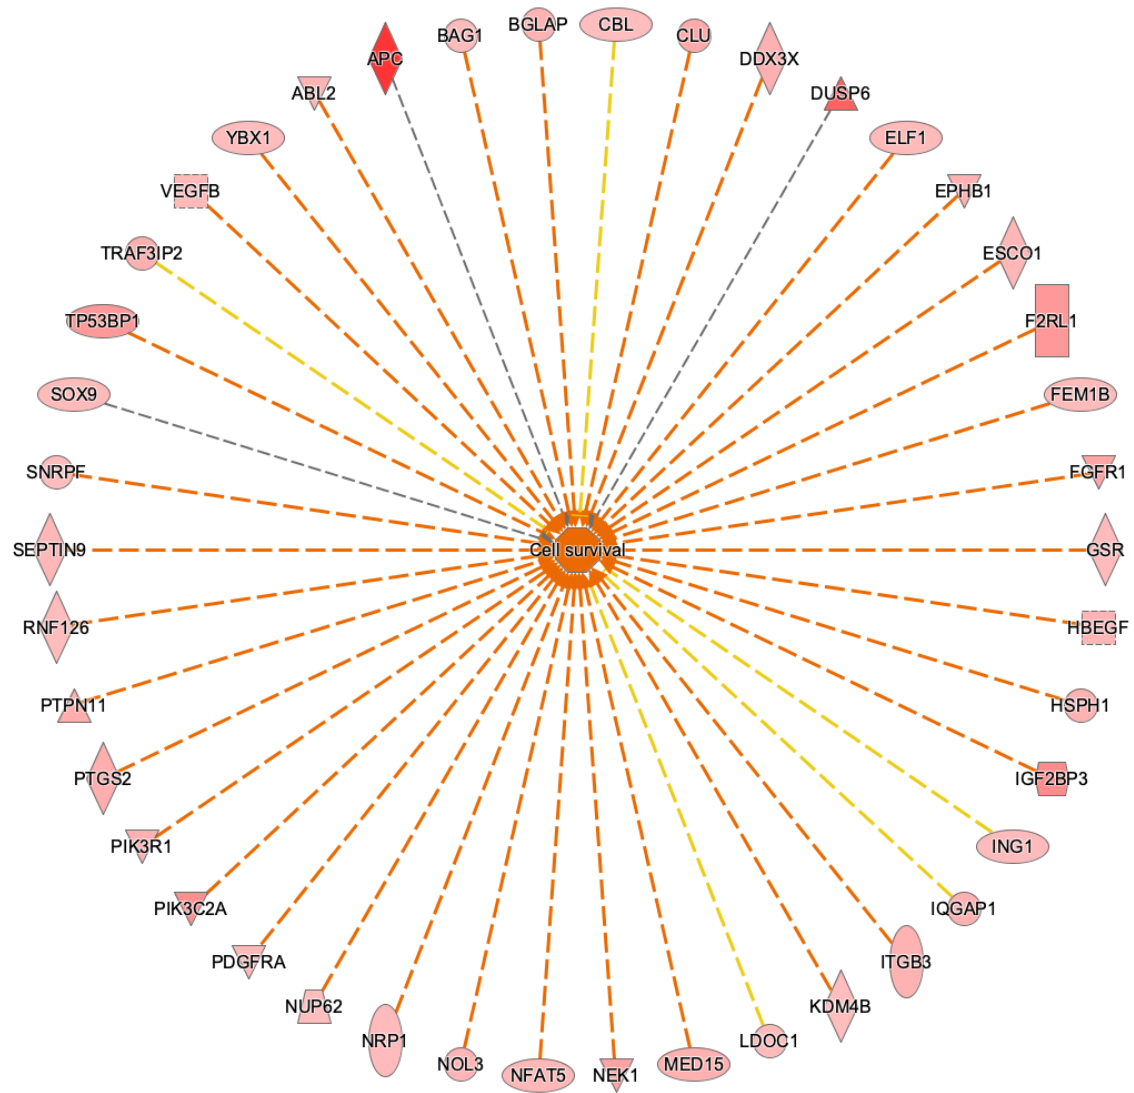

© 2000-2020 QIAGEN. All rights reserved.

**Figure S8b. Network map of the Pt-specifically modulated genes related to the functional category of “Cell survival”.**



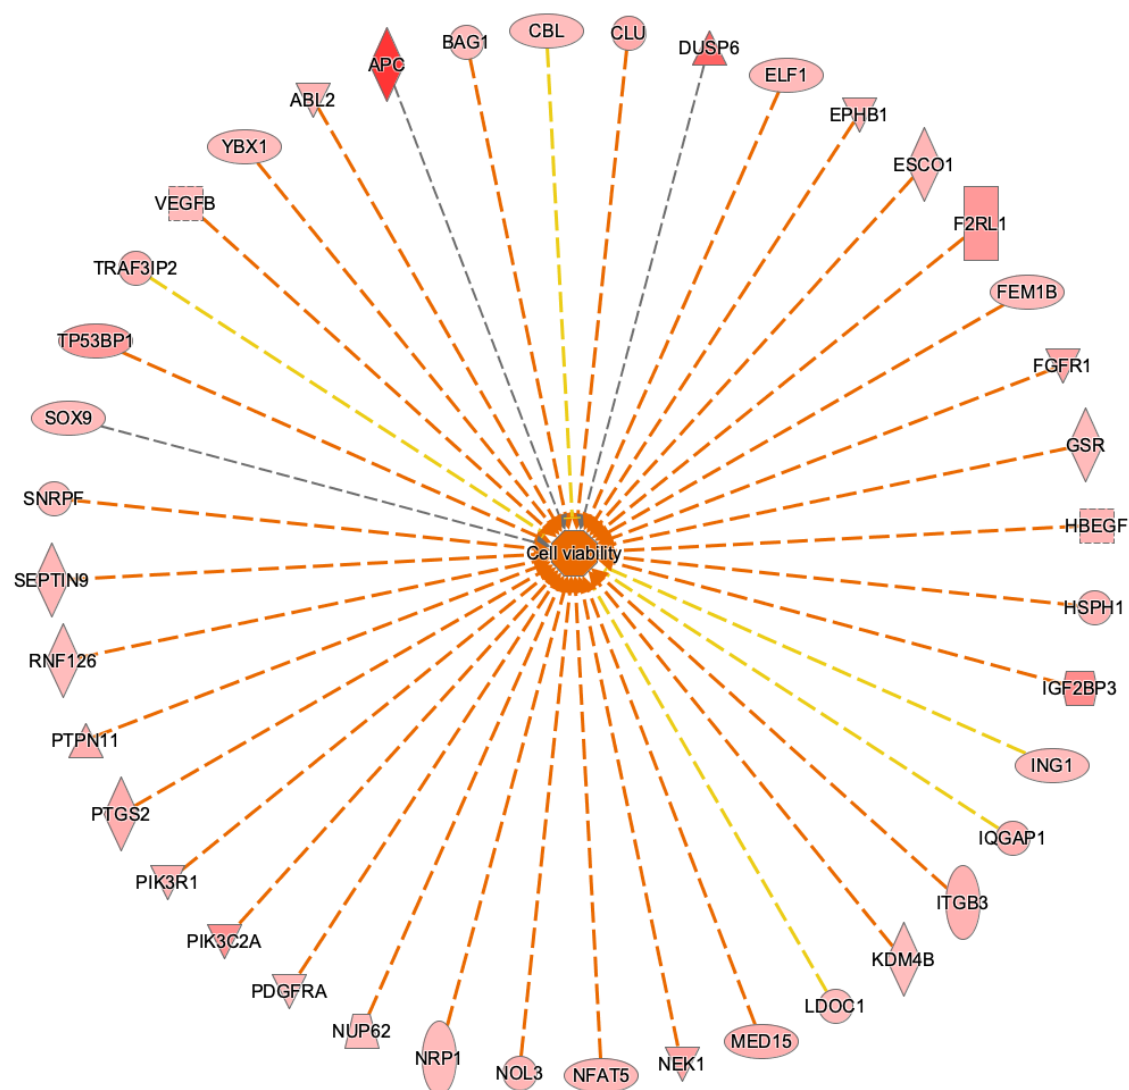

© 2000-2020 QIAGEN. All rights reserved.

**Figure S8c. Network map of the Pt-specifically modulated genes related to the functional category of “Cell viability”.**

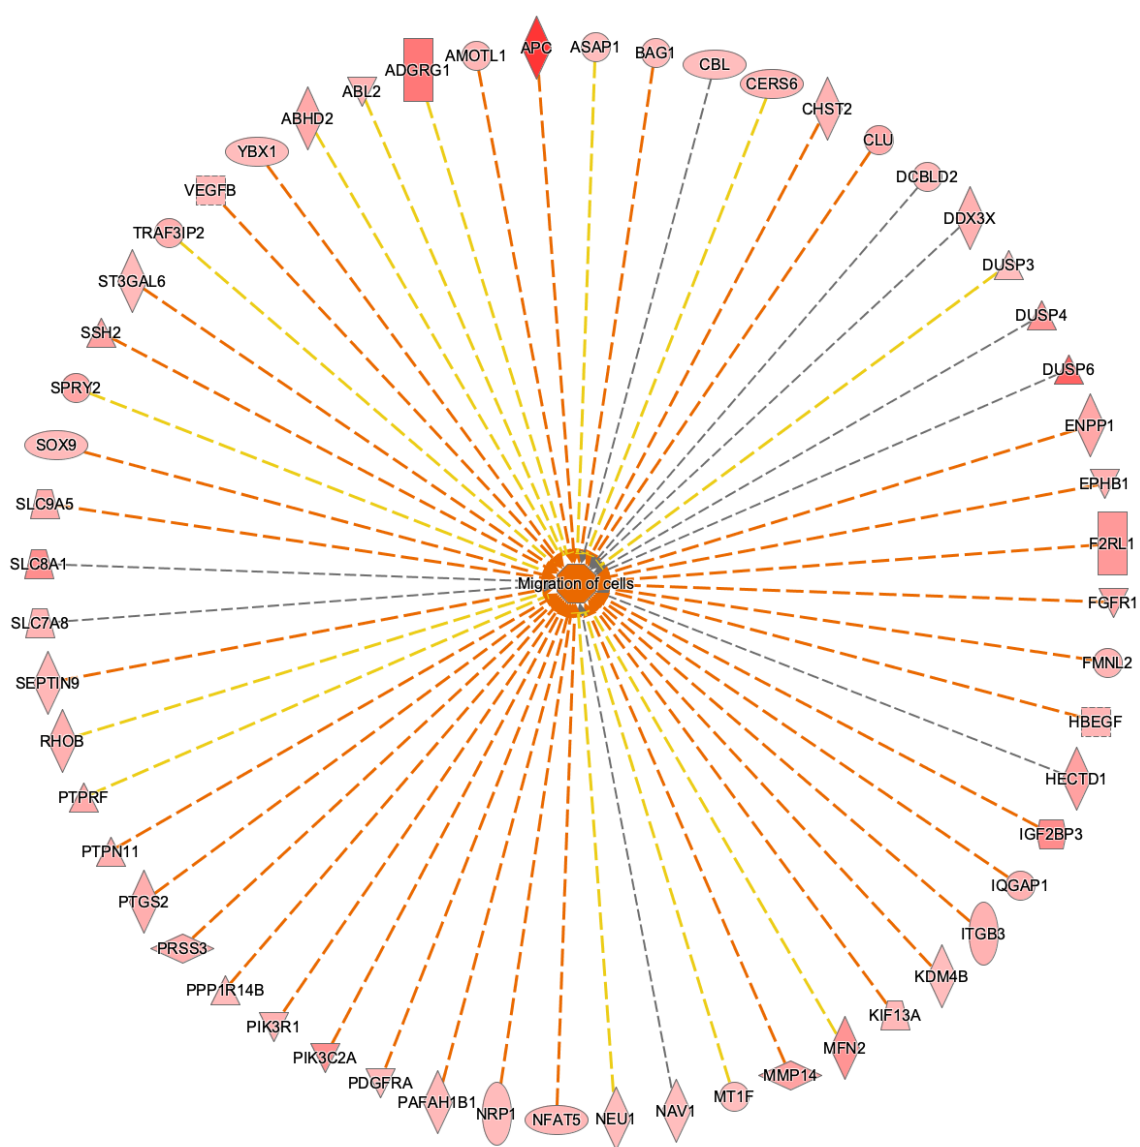

© 2000-2020 QIAGEN. All rights reserved.

**Figure S8d. Network map of the Pt-specifically modulated genes related to the functional category of “Migration of cells”.**

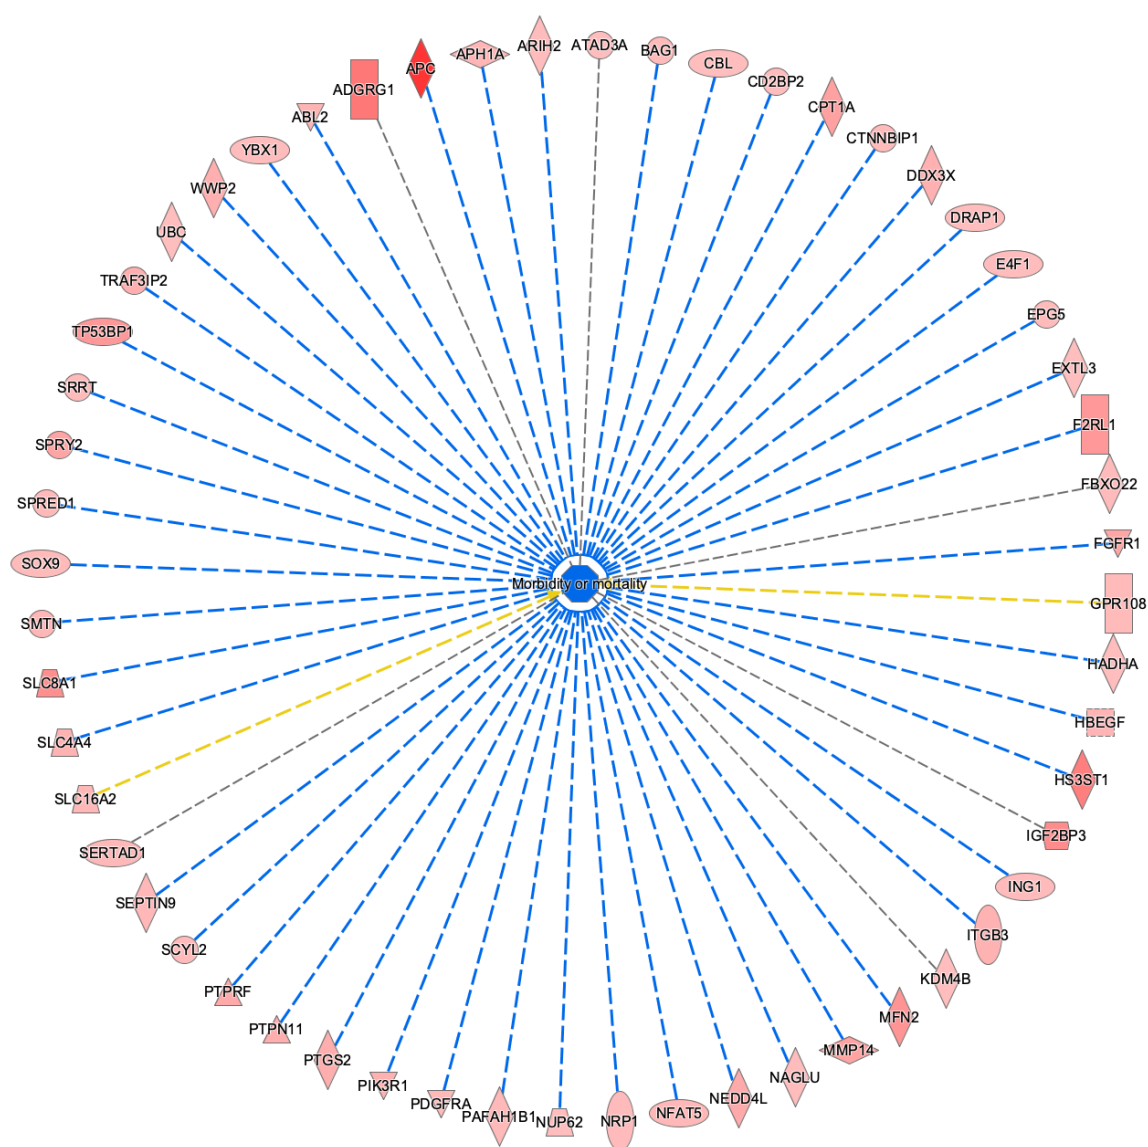

**Figure S8e. Network map of the Pt-specifically modulated genes related to the functional category of “Morbidity or Mortality”.**

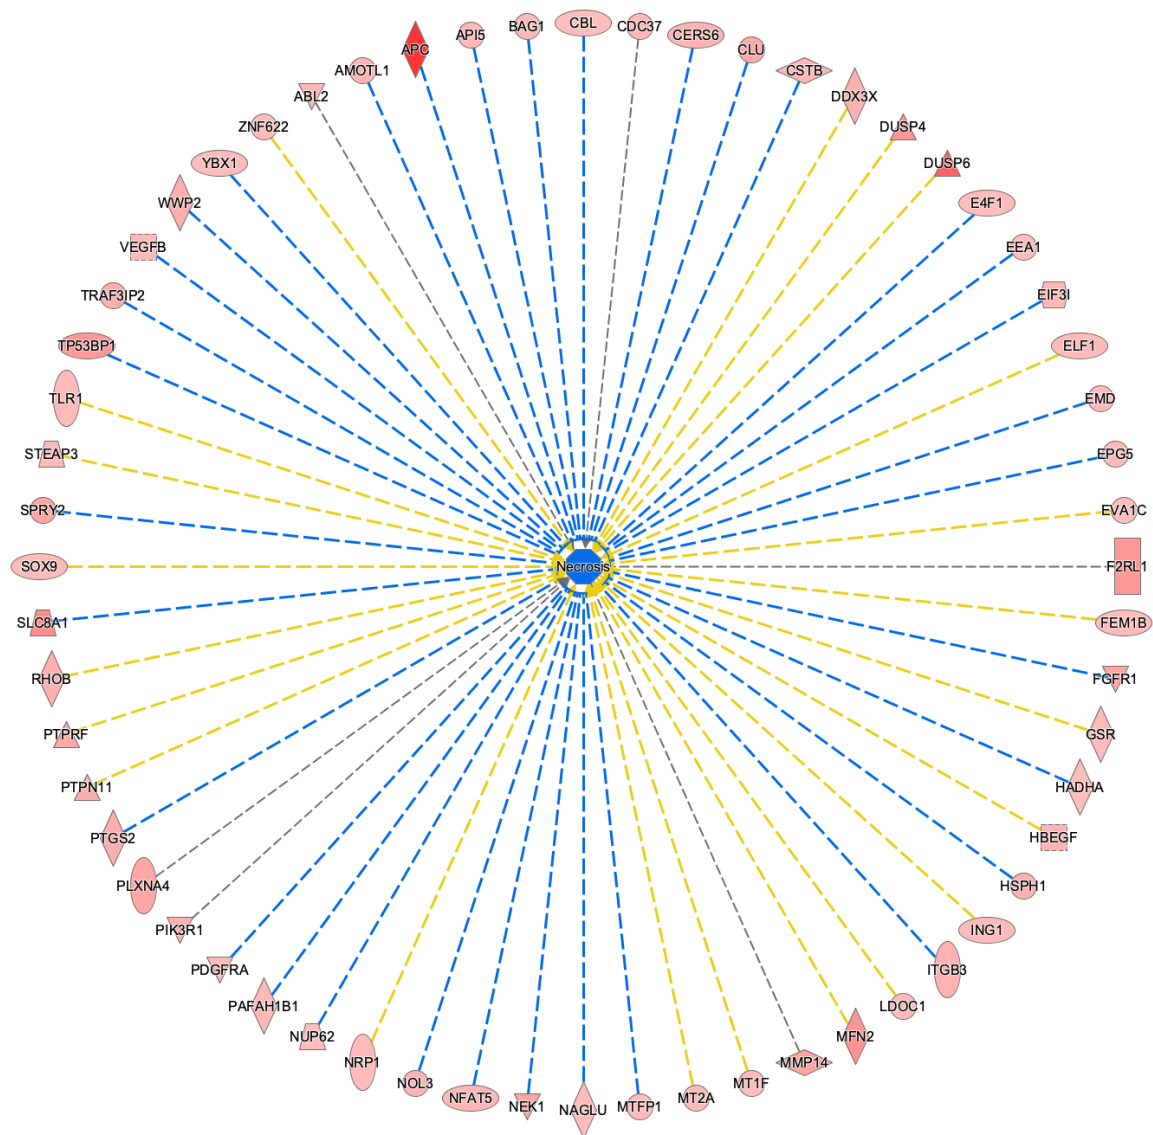

© 2000-2020 QIAGEN. All rights reserved.

**Figure S8f. Network map of the Pt-specifically modulated genes related to the functional category of “Necrosis”.**

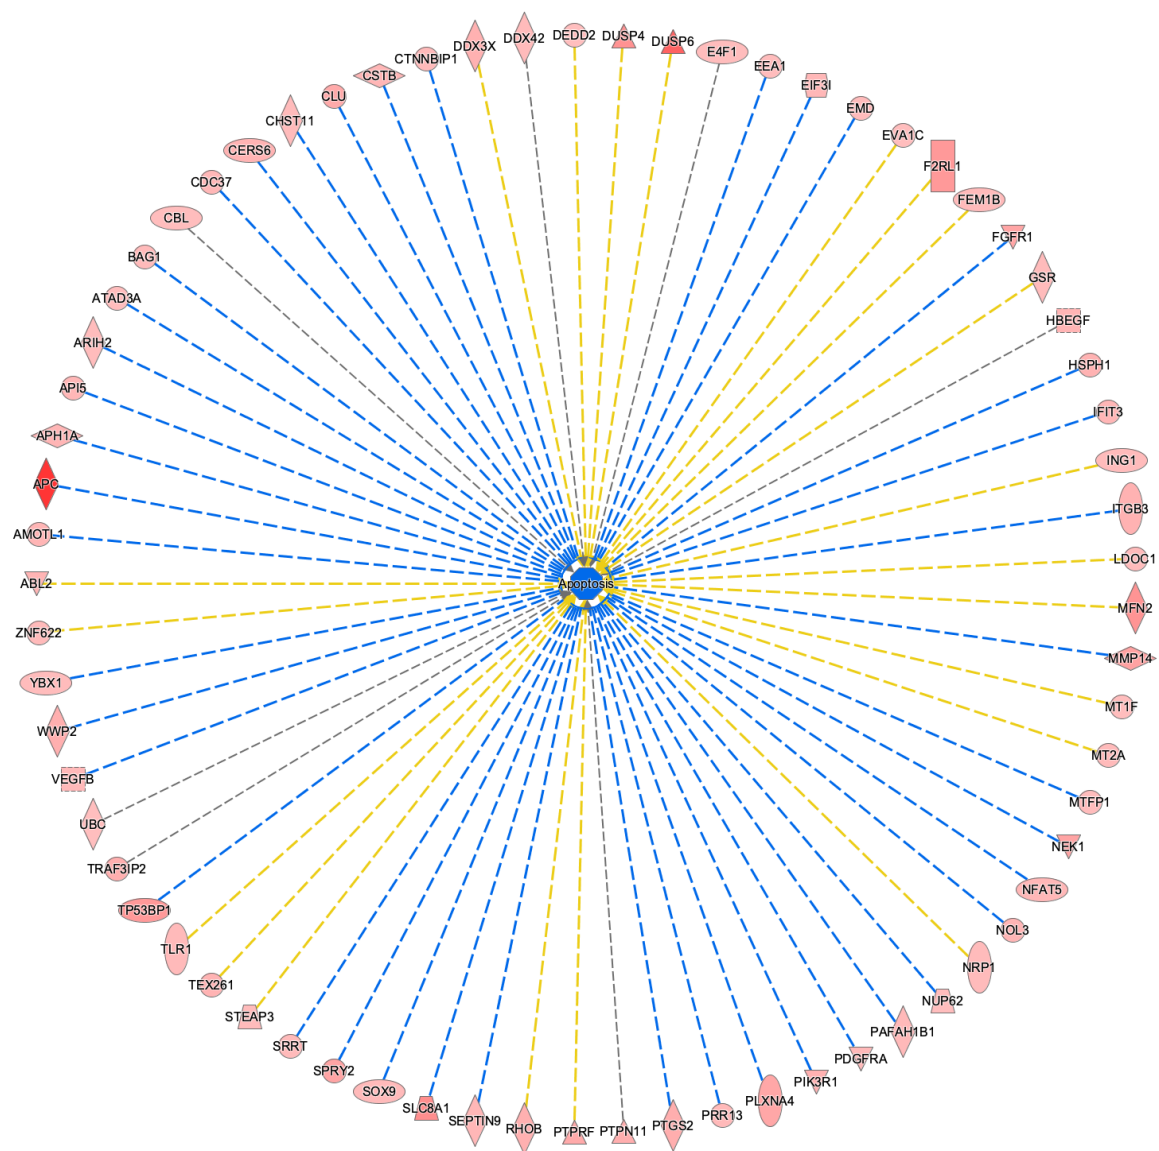

© 2000-2020 QIAGEN. All rights reserved.

**Figure S8g. Network map of the Pt-specifically modulated genes related to the functional category of “Apoptosis”.**

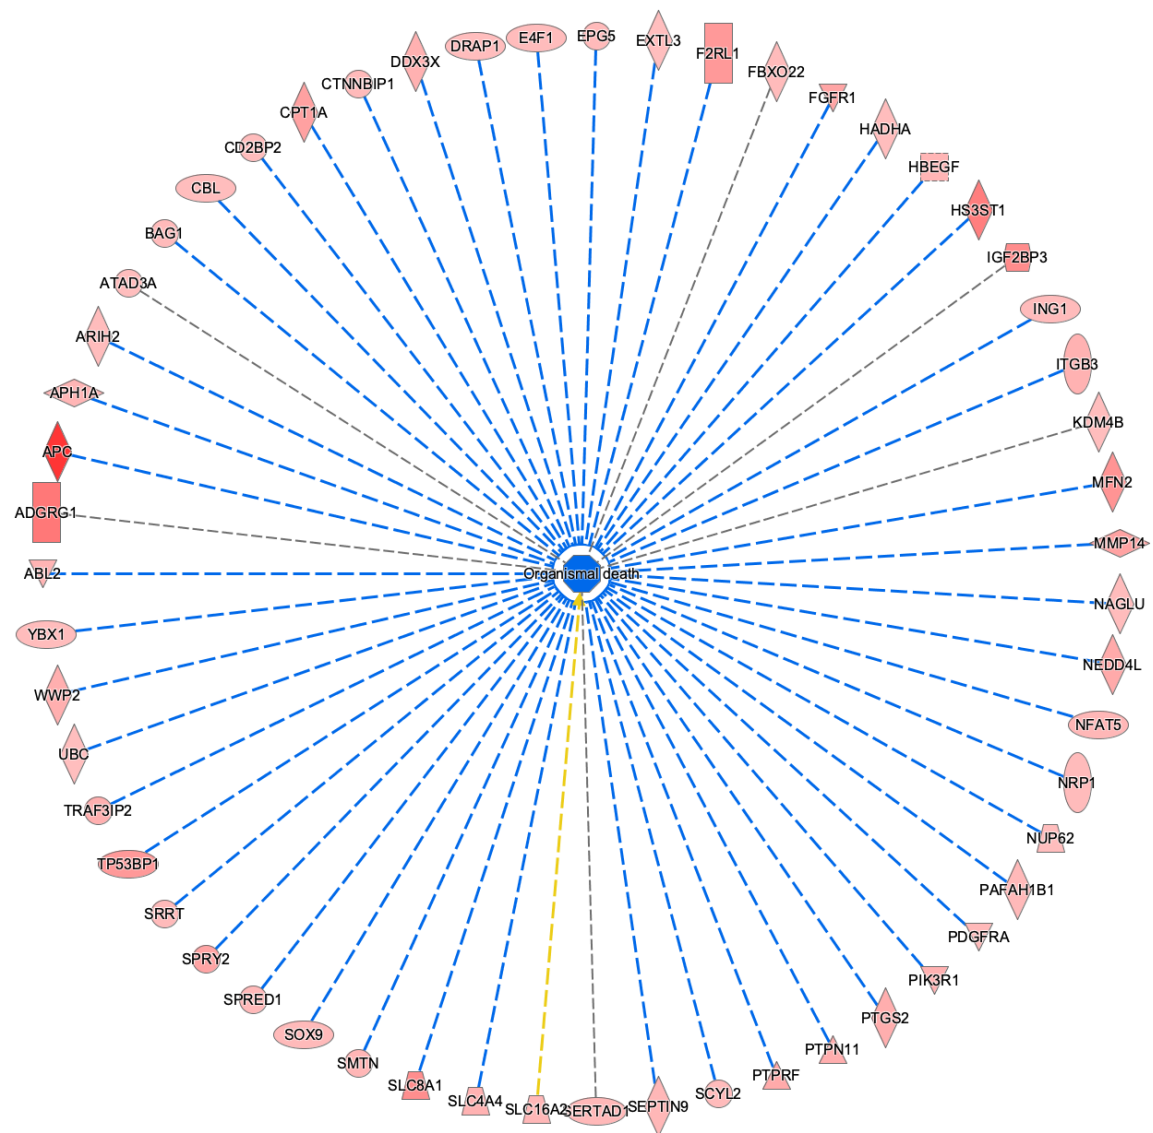

© 2000-2020 QIAGEN. All rights reserved.

**Figure S8h. Network map of the Pt-specifically modulated genes related to the functional category of “Organismal death”.**

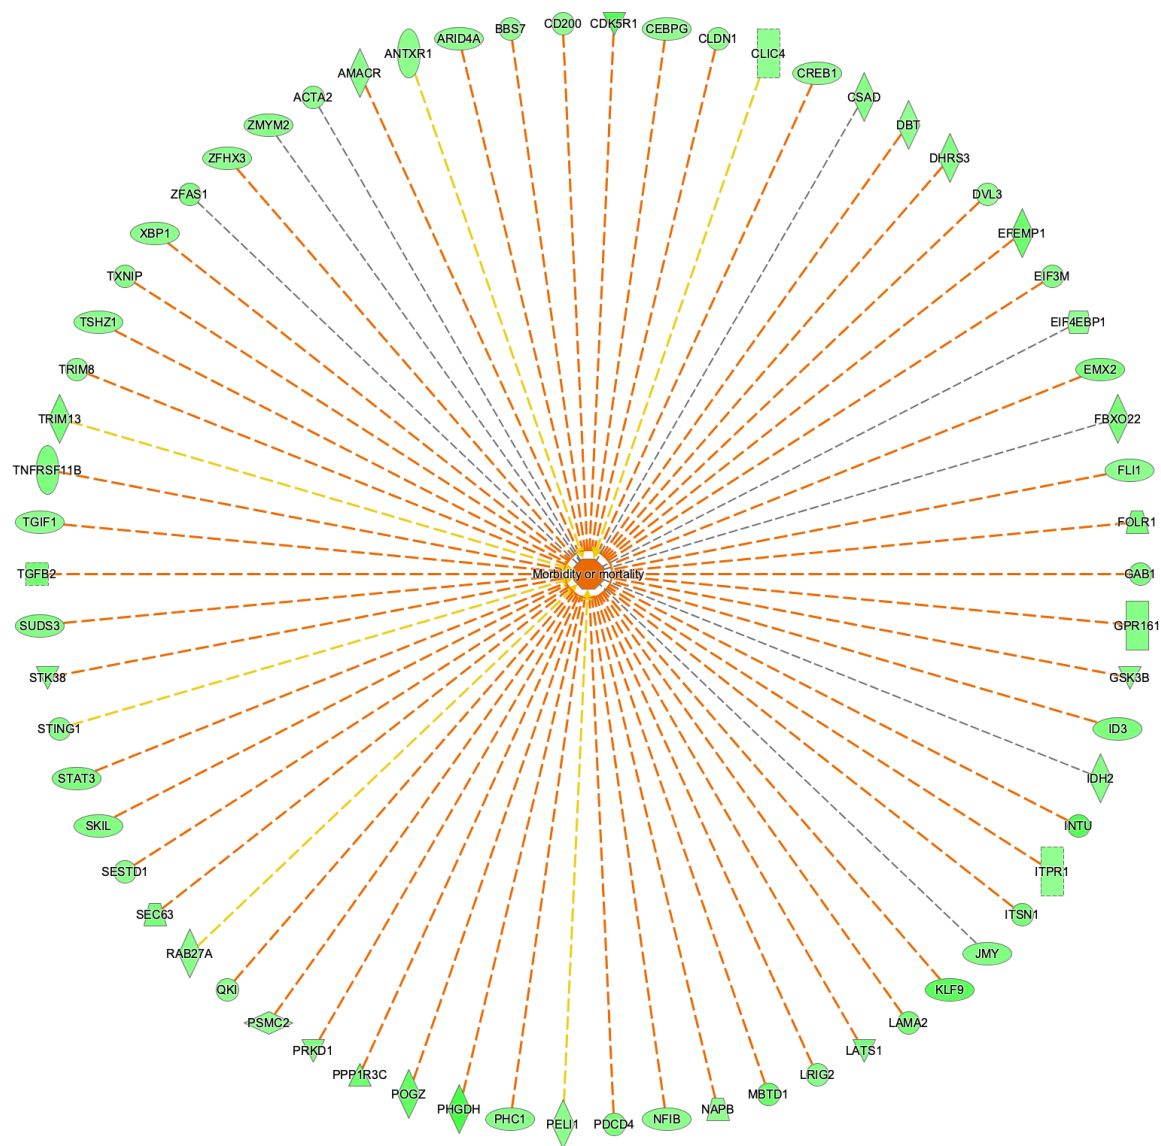

© 2000-2020 QIAGEN. All rights reserved.

**Figure S8i. Network map of the Pt-specifically modulated genes related to the functional category of “Morbidity or Mortality”.**



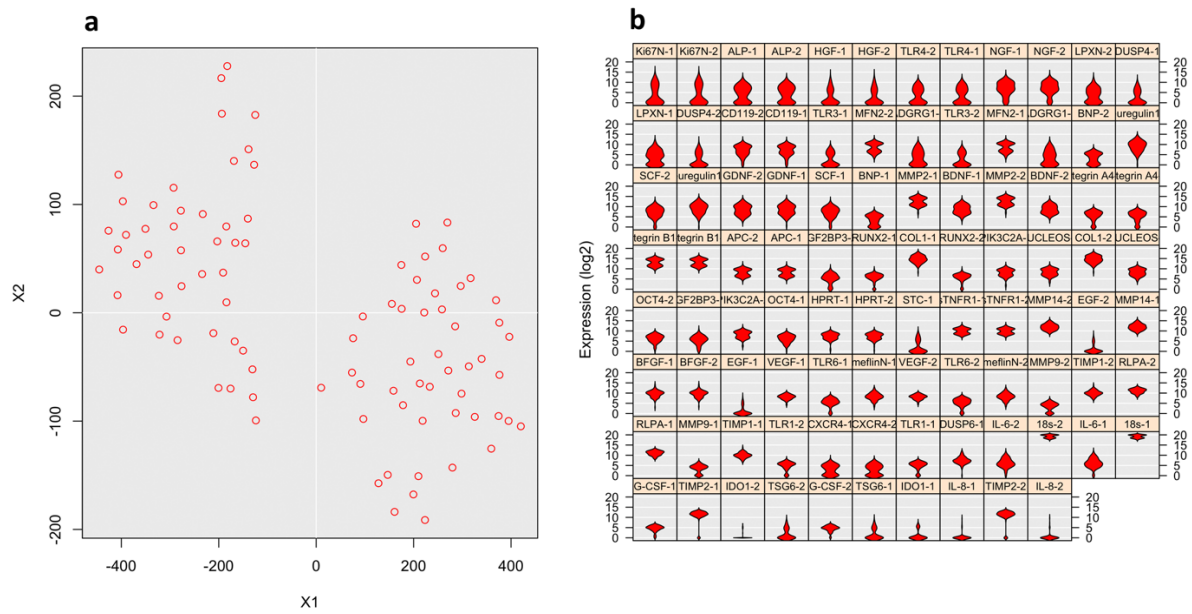

**Figure S9. Single-cell population analysis of gene expression in cells cultured on Pt gels. (a)** tSNE plot. **(b)** Violin plot.

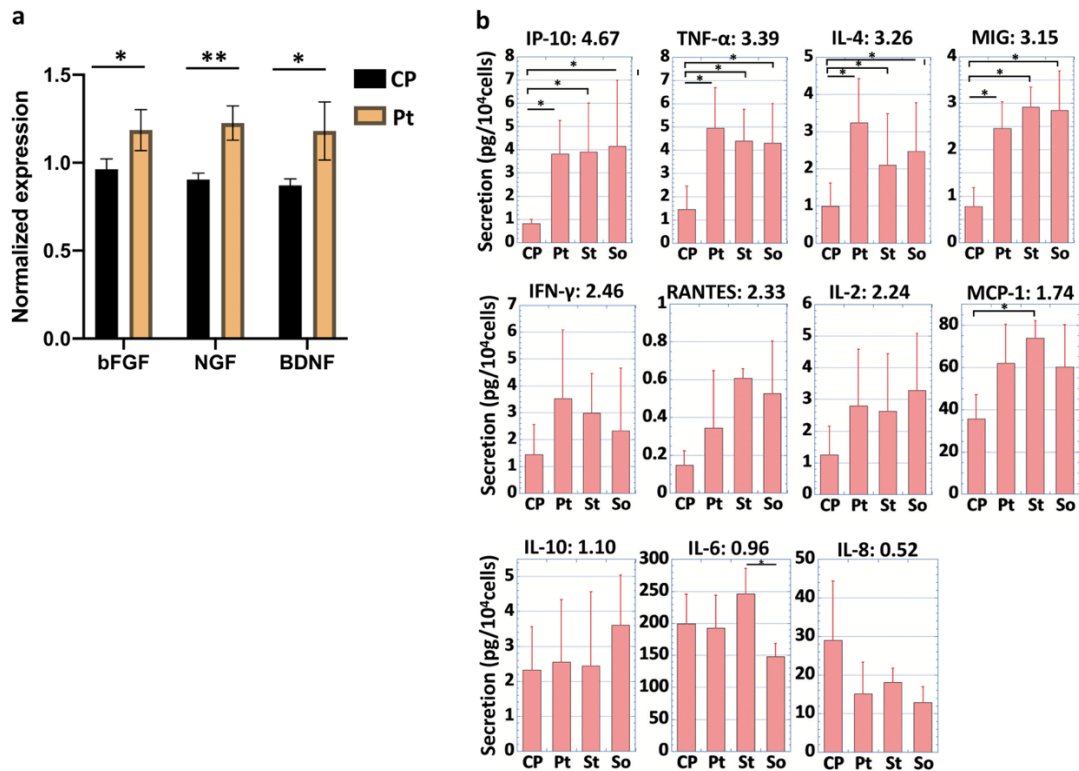

**Figure S10. Expression analysis of therapeutic-related molecules in dual-durotactic MSCs cultured on Pt gels. (a)** Gene expression of bFGF, NGF, and BDNF measured with q-PCR. **(b)** Secretion of cytokines quantified with a microbead array and flow cytometer. The values on each graph show the ratio of the mean secretion level of Pt to that of control CP. \*\* P<0.01, \* P<0.05.



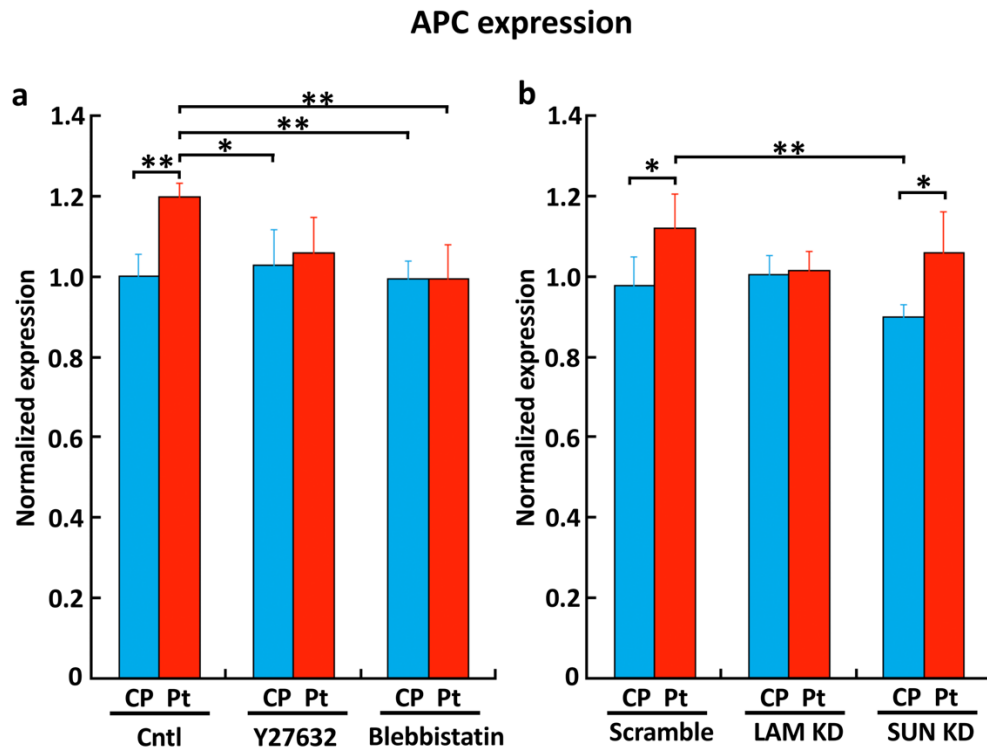

**Figure S11. Effects of cytoskeletal tension inhibitors and knockdown of LINC-related molecules on the expression of APC gene. (a)** APC expression in cells cultured on CP and Pt gels in the presence of Y27632 and blebbistatin measured with q-PCR. **(b)** APC expression in cells cultured on CP and Pt gels under knockdown with siRNA of LaminA/C and SUN1 measured with q-PCR. \*\*  $P < 0.01$ , \*  $P < 0.05$ .

## **Supplementary Movies**

**SI Movie 1. Time-lapse observation of nomadic migration of dual-durotaxing MSCs on a microelastically-patterned gel with stiff triangles**

**SI Movie 2. Representative traction force dynamics in dual-durotaxing MSCs on the Pt gel**

**SI Movie 3. Representative traction force dynamics in MSCs moving on the St gel**

**SI Movie 4. Representative traction force dynamics in MSCs moving on the So gel**

**SI Movie 5. Live imaging of the cell nuclei in dual-durotaxing MSCs on the Pt gel**

**SI Movie 6. Live imaging of the cell nuclei in MSCs moving on CP**

**SI Movie 7. Representative live imaging of chromatin dynamics in a single cell nucleus in MSCs moving on the Pt gel. Scale bar: 10  $\mu\text{m}$**

**SI Movie 8. Representative live imaging of chromatin dynamics in a single cell nucleus in MSCs moving on CP. Scale bar: 10  $\mu\text{m}$**

**SI Movie 9. The most successful live-cell imaging of the moment of nucleocytoplasmic shuttling of YAP in a dual-durotaxing MSC that is crossing the elasticity boundary of a stiff triangle on Pt gel.** By 6hr, YAP is mainly localized in cytoplasm inside the stiff triangle pattern though it is usually localized in the nucleus on the plain stiff gel, which is a typical response on Pt gel due to the time-lag effect of YAP translocation when the cell detects the stiff region. YAP translocation into the nucleus requires several hours after the cell enters the stiff region, while translocation into the cytoplasm also needs several hours after the cell feels the soft region. The dual-durotaxing cell moves over the cell-size-scale stiff region about 4hr in the present patterning, therefore the time-lag of YAP translocation emerges. The cytoplasmic localization of YAP in the stiff triangle region is the delayed response of translocation when the cell felt the soft surroundings. Actually, after 6hr, when the cell crosses the elasticity boundary around the corner of the stiff triangle from the stiff to soft region, YAP starts to translocate from the cytoplasm to the nucleus even though the cell starts to feel the soft region. This is because the cell sensed the stiff region.

## Supplementary Tables

**Table S1. Pt-specific up-regulated genes (>1.5-fold)**

© 2000-2020 QIAGEN. All rights reserved.

| Expr Fold Change | ID       | Entrez Gene Name                                                         |
|------------------|----------|--------------------------------------------------------------------------|
| 4.721            | APC      | APC regulator of WNT signaling pathway                                   |
| 3.614            | DUSP6    | dual specificity phosphatase 6                                           |
| 3.111            | ADGRG1   | adhesion G protein-coupled receptor G1                                   |
| 2.967            | HS3ST1   | heparan sulfate-glucosamine 3-sulfotransferase 1                         |
| 2.888            | LPXN     | leupaxin                                                                 |
| 2.75             | RNF128   | ring finger protein 128                                                  |
| 2.641            | IGF2BP3  | insulin like growth factor 2 mRNA binding protein 3                      |
| 2.593            | SLC8A1   | solute carrier family 8 member A1                                        |
| 2.585            | PIK3C2A  | phosphatidylinositol-4-phosphate 3-kinase catalytic subunit type 2 alpha |
| 2.511            | DUSP4    | dual specificity phosphatase 4                                           |
| 2.464            | MFN2     | mitofusin 2                                                              |
| 2.358            | F2RL1    | F2R like trypsin receptor 1                                              |
| 2.339            | TP53BP1  | tumor protein p53 binding protein 1                                      |
| 2.174            | HECTD1   | HECT domain E3 ubiquitin protein ligase 1                                |
| 2.169            | MPP4     | membrane palmitoylated protein 4                                         |
| 2.16             | CPT1A    | camitine palmitoyltransferase 1A                                         |
| 2.153            | SSH2     | slingshot protein phosphatase 2                                          |
| 2.143            | PKIA     | cAMP-dependent protein kinase inhibitor alpha                            |
| 2.135            | MMP14    | matrix metalloproteinase 14                                              |
| 2.099            | ZFXH4    | zinc finger homeobox 4                                                   |
| 2.095            | NEK1     | NIMA related kinase 1                                                    |
| 2.087            | SPRY2    | sprouty RTK signaling antagonist 2                                       |
| 2.08             | FGFR1    | fibroblast growth factor receptor 1                                      |
| 2.043            | CHP1     | calcineurin like EF-hand protein 1                                       |
| 2.034            | PLXNA4   | plexin A4                                                                |
| 2.034            | RGS2     | regulator of G protein signaling 2                                       |
| 2.025            | ENPP1    | ectonucleotide pyrophosphatase/phosphodiesterase 1                       |
| 2.016            | ABLIM1   | actin binding LIM protein 1                                              |
| 2.015            | CLTB     | clathrin light chain B                                                   |
| 1.984            | ABHD2    | abhydrolase domain containing 2, acylglycerol lipase                     |
| 1.962            | CLU      | clusterin                                                                |
| 1.957            | NEDD4L   | NEDD4 like E3 ubiquitin protein ligase                                   |
| 1.945            | PTPRF    | protein tyrosine phosphatase receptor type F                             |
| 1.9              | SLC9A5   | solute carrier family 9 member A5                                        |
| 1.872            | PTGS2    | prostaglandin-endoperoxide synthase 2                                    |
| 1.867            | OTUD4    | OTU deubiquitinase 4                                                     |
| 1.862            | PRSS3    | serine protease 3                                                        |
| 1.856            | PTPN11   | protein tyrosine phosphatase non-receptor type 11                        |
| 1.851            | TRAF3IP2 | TRAF3 interacting protein 2                                              |
| 1.842            | LOXL4    | lysyl oxidase like 4                                                     |
| 1.839            | WWP2     | WW domain containing E3 ubiquitin protein ligase 2                       |
| 1.834            | LARS     | leucyl-tRNA synthetase 1                                                 |
| 1.825            | GALNT6   | polypeptide N-acetylgalactosaminyltransferase 6                          |
| 1.817            | RHOB     | ras homolog family member B                                              |
| 1.814            | EPHB1    | EPH receptor B1                                                          |
| 1.81             | KIAA0100 | KIAA0100                                                                 |
| 1.81             | PQLC2    | solute carrier family 66 member 1                                        |
| 1.809            | EGFLAM   | EGF like, fibronectin type III and laminin G domains                     |
| 1.807            | MED15    | mediator complex subunit 15                                              |
| 1.799            | IQGAP1   | IQ motif containing GTPase activating protein 1                          |
| 1.796            | PIK3R1   | phosphoinositide-3-kinase regulatory subunit 1                           |
| 1.788            | DDX3X    | DEAD-box helicase 3 X-linked                                             |
| 1.774            | ITGB3    | integrin subunit beta 3                                                  |
| 1.769            | SLC4A4   | solute carrier family 4 member 4                                         |
| 1.761            | HSPH1    | heat shock protein family H (Hsp110) member 1                            |
| 1.75             | CERS6    | ceramide synthase 6                                                      |
| 1.747            | TEX261   | testis expressed 261                                                     |
| 1.746            | CHST2    | carbohydrate sulfotransferase 2                                          |
| 1.746            | TNIK     | TRAF2 and NCK interacting kinase                                         |
| 1.739            | BGLAP    | bone gamma-carboxyglutamate protein                                      |
| 1.739            | PHACTR2  | phosphatase and actin regulator 2                                        |
| 1.737            | CACTIN   | cactin, spliceosome C complex subunit                                    |
| 1.727            | ABL2     | ABL proto-oncogene 2, non-receptor tyrosine kinase                       |

|       |             |                                                                      |
|-------|-------------|----------------------------------------------------------------------|
| 1.726 | NIPAL2      | NIPA like domain containing 2                                        |
| 1.725 | FMNL2       | formin like 2                                                        |
| 1.723 | SLC16A7     | solute carrier family 16 member 7                                    |
| 1.715 | LRTOMT      | leucine rich transmembrane and O-methyltransferase domain containing |
| 1.715 | SLC7A8      | solute carrier family 7 member 8                                     |
| 1.713 | ANKRD13C    | ankyrin repeat domain 13C                                            |
| 1.709 | APH1A       | aph-1 homolog A, gamma-secretase subunit                             |
| 1.709 | HBEGF       | heparin binding EGF like growth factor                               |
| 1.706 | AMOTL1      | angiomin like 1                                                      |
| 1.698 | C3orf52     | chromosome 3 open reading frame 52                                   |
| 1.698 | NOL3        | nucleolar protein 3                                                  |
| 1.695 | BLOC1S4     | biogenesis of lysosomal organelles complex 1 subunit 4               |
| 1.682 | CDC27       | cell division cycle 27                                               |
| 1.679 | CSTB        | cystatin B                                                           |
| 1.678 | IFIT3       | interferon induced protein with tetratricopeptide repeats 3          |
| 1.674 | SMTN        | smoothelin                                                           |
| 1.672 | ESCO1       | establishment of sister chromatid cohesion N-acetyltransferase 1     |
| 1.665 | TOR4A       | torsin family 4 member A                                             |
| 1.662 | EIF3I       | eukaryotic translation initiation factor 3 subunit I                 |
| 1.662 | MAP3K6      | mitogen-activated protein kinase kinase kinase 6                     |
| 1.662 | SEPT9       | septin 9                                                             |
| 1.662 | SLC41A2     | solute carrier family 41 member 2                                    |
| 1.659 | API5        | apoptosis inhibitor 5                                                |
| 1.656 | NSL1        | NSL1 component of MIS12 kinetochore complex                          |
| 1.654 | FRMD4A      | FERM domain containing 4A                                            |
| 1.65  | NFAT5       | nuclear factor of activated T cells 5                                |
| 1.648 | SLC16A2     | solute carrier family 16 member 2                                    |
| 1.646 | CDC37       | cell division cycle 37, HSP90 cochaperone                            |
| 1.645 | FOXP3       | forkhead box N3                                                      |
| 1.642 | KIF13A      | kinesin family member 13A                                            |
| 1.634 | DCBLD2      | discoidin, CUB and LCCL domain containing 2                          |
| 1.633 | AP3D1       | adaptor related protein complex 3 subunit delta 1                    |
| 1.629 | SERTAD1     | SERTA domain containing 1                                            |
| 1.623 | FAM126A     | family with sequence similarity 126 member A                         |
| 1.62  | PRKAR2A     | protein kinase cAMP-dependent type II regulatory subunit alpha       |
| 1.616 | FBXL15      | F-box and leucine rich repeat protein 15                             |
| 1.616 | PDGFRA      | platelet derived growth factor receptor alpha                        |
| 1.616 | RBM14       | RNA binding motif protein 14                                         |
| 1.616 | VEGFB       | vascular endothelial growth factor B                                 |
| 1.615 | PAFAH1B1    | platelet activating factor acetylhydrolase 1b regulatory subunit 1   |
| 1.608 | PRR13       | proline rich 13                                                      |
| 1.608 | SCARA3      | scavenger receptor class A member 3                                  |
| 1.608 | ZNF688      | zinc finger protein 688                                              |
| 1.604 | C19orf24    | family with sequence similarity 174 member C                         |
| 1.602 | MT1E        | metallothionein 1E                                                   |
| 1.598 | SPRED1      | sprouty related EVH1 domain containing 1                             |
| 1.596 | GLYR1       | glyoxylate reductase 1 homolog                                       |
| 1.596 | PURB        | purine rich element binding protein B                                |
| 1.595 | CTNBP1      | catenin beta interacting protein 1                                   |
| 1.595 | PITHD1      | PITH domain containing 1                                             |
| 1.594 | EPG5        | ectopic P-granules autophagy protein 5 homolog                       |
| 1.592 | TLR1        | toll like receptor 1                                                 |
| 1.591 | MT2A        | metallothionein 2A                                                   |
| 1.59  | H1FX        | H1.10 linker histone                                                 |
| 1.587 | SOX9        | SRY-box transcription factor 9                                       |
| 1.587 | SRRT        | serrate, RNA effector molecule                                       |
| 1.587 | ST3GAL6     | ST3 beta-galactoside alpha-2,3-sialyltransferase 6                   |
| 1.586 | ZNF622      | zinc finger protein 622                                              |
| 1.584 | FEM1B       | fem-1 homolog B                                                      |
| 1.583 | ELF1        | E74 like ETS transcription factor 1                                  |
| 1.58  | BAG1        | BAG cochaperone 1                                                    |
| 1.578 | DSEL        | dermatan sulfate epimerase like                                      |
| 1.577 | GPR108      | G protein-coupled receptor 108                                       |
| 1.576 | CLN6        | CLN6 transmembrane ER protein                                        |
| 1.573 | LDLC1       | LDLC1 regulator of NFkB signaling                                    |
| 1.565 | GSR         | glutathione-disulfide reductase                                      |
| 1.564 | NRP1        | neuropilin 1                                                         |
| 1.562 | MORF4L2-AS1 | MORF4L2 antisense RNA 1                                              |
| 1.562 | TBC1D20     | TBC1 domain family member 20                                         |
| 1.558 | DDX42       | DEAD-box helicase 42                                                 |
| 1.557 | EIF2B3      | eukaryotic translation initiation factor 2B subunit gamma            |

|       |          |                                                                               |
|-------|----------|-------------------------------------------------------------------------------|
| 1.557 | PPP1R14B | protein phosphatase 1 regulatory inhibitor subunit 14B                        |
| 1.556 | CHST11   | carbohydrate sulfotransferase 11                                              |
| 1.555 | SCYL2    | SCY1 like pseudokinase 2                                                      |
| 1.554 | EMD      | emerin                                                                        |
| 1.554 | FBXO22   | F-box protein 22                                                              |
| 1.554 | ZC3H7A   | zinc finger CCCH-type containing 7A                                           |
| 1.553 | STEAP3   | STEAP3 metalloredutase                                                        |
| 1.552 | ING1     | inhibitor of growth family member 1                                           |
| 1.552 | SLC35E3  | solute carrier family 35 member E3                                            |
| 1.55  | EEA1     | early endosome antigen 1                                                      |
| 1.547 | YBX1     | Y-box binding protein 1                                                       |
| 1.545 | ANOS1    | anosmin 1                                                                     |
| 1.545 | CD2BP2   | CD2 cytoplasmic tail binding protein 2                                        |
| 1.544 | MTFP1    | mitochondrial fission process 1                                               |
| 1.543 | TMED4    | transmembrane p24 trafficking protein 4                                       |
| 1.54  | EMB      | embigin                                                                       |
| 1.539 | GPATCH2  | G-patch domain containing 2                                                   |
| 1.539 | RNF126   | ring finger protein 126                                                       |
| 1.537 | ARIH2    | ariadne RBR E3 ubiquitin protein ligase 2                                     |
| 1.537 | FBXO33   | F-box protein 33                                                              |
| 1.536 | SNRPF    | small nuclear ribonucleoprotein polypeptide F                                 |
| 1.535 | CRTAP    | cartilage associated protein                                                  |
| 1.535 | NEU1     | neuraminidase 1                                                               |
| 1.535 | SURF2    | surfeit 2                                                                     |
| 1.532 | DIEXF    | UTP25 small subunit processor component                                       |
| 1.531 | METTL7B  | methyltransferase like 7B                                                     |
| 1.53  | E4F1     | E4F transcription factor 1                                                    |
| 1.529 | NAGLU    | N-acetyl-alpha-glucosaminidase                                                |
| 1.528 | ZNF480   | zinc finger protein 480                                                       |
| 1.526 | CBL      | Cbl proto-oncogene                                                            |
| 1.526 | MRPL4    | mitochondrial ribosomal protein L4                                            |
| 1.524 | CDK16    | cyclin dependent kinase 16                                                    |
| 1.522 | FBXW5    | F-box and WD repeat domain containing 5                                       |
| 1.521 | ASAP1    | ArfGAP with SH3 domain, ankyrin repeat and PH domain 1                        |
| 1.519 | CLIC1    | chloride intracellular channel 1                                              |
| 1.519 | GRHL1    | grainyhead like transcription factor 1                                        |
| 1.518 | HADHA    | hydroxyacyl-CoA dehydrogenase trifunctional multienzyme complex subunit alpha |
| 1.517 | ADAMTS5  | ADAM metalloproteinase with thrombospondin type 1 motif 5                     |
| 1.517 | COPRS    | coordinator of PRMT5 and differentiation stimulator                           |
| 1.516 | NAV1     | neuron navigator 1                                                            |
| 1.514 | EID1     | EP300 interacting inhibitor of differentiation 1                              |
| 1.514 | EVA1C    | eva-1 homolog C                                                               |
| 1.513 | KIAA1217 | KIAA1217                                                                      |
| 1.511 | MT1F     | metallothionein 1F                                                            |
| 1.509 | DRAP1    | DR1 associated protein 1                                                      |
| 1.508 | ATP11A   | ATPase phospholipid transporting 11A                                          |
| 1.508 | KDM4B    | lysine demethylase 4B                                                         |
| 1.508 | MUL1     | mitochondrial E3 ubiquitin protein ligase 1                                   |
| 1.508 | NUP62    | nucleoporin 62                                                                |
| 1.506 | ATAD3A   | ATPase family AAA domain containing 3A                                        |
| 1.506 | MCAT     | malonyl-CoA-acyl carrier protein transacylase                                 |
| 1.505 | DUSP3    | dual specificity phosphatase 3                                                |
| 1.504 | EXTL3    | exostosin like glycosyltransferase 3                                          |
| 1.504 | TOMM34   | translocase of outer mitochondrial membrane 34                                |
| 1.503 | DEDD2    | death effector domain containing 2                                            |
| 1.503 | HPCAL1   | hippocalcin like 1                                                            |
| 1.503 | UBC      | ubiquitin C                                                                   |
| 1.502 | SEC14L1  | SEC14 like lipid binding 1                                                    |

**Table S1. contuned. Pt-specific down-regulated genes (<0.67-fold)**

© 2000-2020 QIAGEN. All rights reserved.

| Expr Fold Change | ID      | Entrez Gene Name                    |
|------------------|---------|-------------------------------------|
| -3.223           | B3GALT2 | beta-1,3-galactosyltransferase 2    |
| -3.052           | TRIB3   | tribbles pseudokinase 3             |
| -2.973           | SCAF4   | SR-related CTD associated factor 4  |
| -2.925           | ITGA1   | integrin subunit alpha 1            |
| -2.872           | TTC39B  | tetratricopeptide repeat domain 39B |
| -2.608           | AIG1    | androgen induced 1                  |

|        |              |                                                                  |
|--------|--------------|------------------------------------------------------------------|
| -2.525 | PHGDH        | phosphoglycerate dehydrogenase                                   |
| -2.516 | LCA5         | lebercilin LCA5                                                  |
| -2.502 | ELL3         | elongation factor for RNA polymerase II 3                        |
| -2.484 | SRGAP2C      | SLIT-ROBO Rho GTPase activating protein 2C                       |
| -2.401 | HOMER2       | homer scaffold protein 2                                         |
| -2.374 | SDCBP2-AS1   | SDCBP2 antisense RNA 1                                           |
| -2.353 | CDK5R1       | cyclin dependent kinase 5 regulatory subunit 1                   |
| -2.303 | INTU         | inturned planar cell polarity protein                            |
| -2.287 | ZMYM5        | zinc finger MYM-type containing 5                                |
| -2.243 | KLF9         | Kruppel like factor 9                                            |
| -2.234 | KCNE4        | potassium voltage-gated channel subfamily E regulatory subunit 4 |
| -2.217 | RNF180       | ring finger protein 180                                          |
| -2.206 | LOC100289230 | uncharacterized LOC100289230                                     |
| -2.193 | SESN3        | sestrin 3                                                        |
| -2.19  | PRR5L        | proline rich 5 like                                              |
| -2.189 | XPNPEP3      | X-prolyl aminopeptidase 3                                        |
| -2.173 | DLX6         | distal-less homeobox 6                                           |
| -2.17  | CEP126       | centrosomal protein 126                                          |
| -2.159 | PTPN13       | protein tyrosine phosphatase non-receptor type 13                |
| -2.15  | CEP152       | centrosomal protein 152                                          |
| -2.14  | CPE          | carboxypeptidase E                                               |
| -2.134 | POGZ         | pogo transposable element derived with ZNF domain                |
| -2.128 | GIGYF2       | GRB10 interacting GYF protein 2                                  |
| -2.117 | LINC00662    | long intergenic non-protein coding RNA 662                       |
| -2.084 | FAM110B      | family with sequence similarity 110 member B                     |
| -2.084 | RNF150       | ring finger protein 150                                          |
| -2.067 | TMEM67       | transmembrane protein 67                                         |
| -2.063 | FBXO30       | F-box protein 30                                                 |
| -2.055 | ZNF462       | zinc finger protein 462                                          |
| -2.028 | LGMN         | legumain                                                         |
| -2.023 | MBTD1        | mbt domain containing 1                                          |
| -2.02  | ZNF720       | zinc finger protein 720                                          |
| -2.016 | RUSC1-AS1    | RUSC1 antisense RNA 1                                            |
| -2.014 | WDR76        | WD repeat domain 76                                              |
| -2.012 | BMS1P5       | BMS1 pseudogene 1                                                |
| -2.012 | WNK1         | WNK lysine deficient protein kinase 1                            |
| -2.005 | EFEMP1       | EGF containing fibulin extracellular matrix protein 1            |
| -1.991 | VPS13D       | vacuolar protein sorting 13 homolog D                            |
| -1.988 | CCDC113      | coiled-coil domain containing 113                                |
| -1.965 | MKNK2        | MAPK interacting serine/threonine kinase 2                       |
| -1.962 | PPP1R3C      | protein phosphatase 1 regulatory subunit 3C                      |
| -1.938 | TMEM182      | transmembrane protein 182                                        |
| -1.92  | CYB5R2       | cytochrome b5 reductase 2                                        |
| -1.918 | TGFB2        | transforming growth factor beta 2                                |
| -1.904 | ZNF623       | zinc finger protein 623                                          |
| -1.903 | HAPLN3       | hyaluronan and proteoglycan link protein 3                       |
| -1.889 | LAMA2        | laminin subunit alpha 2                                          |
| -1.883 | LOC389906    | zinc finger protein 839 pseudogene                               |
| -1.861 | ITSN1        | intersectin 1                                                    |
| -1.86  | IPP          | intracisternal A particle-promoted polypeptide                   |
| -1.858 | FOLR1        | folate receptor alpha                                            |
| -1.853 | PABPC5       | poly(A) binding protein cytoplasmic 5                            |
| -1.851 | SSPN         | sarcospan                                                        |
| -1.851 | ZCCHC18      | zinc finger CCHC-type containing 18                              |
| -1.846 | IL20RB       | interleukin 20 receptor subunit beta                             |
| -1.846 | WDR27        | WD repeat domain 27                                              |
| -1.842 | SAP30        | Sin3A associated protein 30                                      |
| -1.826 | PRMT2        | protein arginine methyltransferase 2                             |
| -1.821 | TRIM13       | tripartite motif containing 13                                   |
| -1.819 | RAB30        | RAB30, member RAS oncogene family                                |
| -1.818 | CEP97        | centrosomal protein 97                                           |
| -1.818 | SEC63        | SEC63 homolog, protein translocation regulator                   |
| -1.807 | KANSL1L      | KAT8 regulatory NSL complex subunit 1 like                       |
| -1.807 | LATS1        | large tumor suppressor kinase 1                                  |
| -1.803 | PDCD4        | programmed cell death 4                                          |
| -1.8   | ZNF431       | zinc finger protein 431                                          |
| -1.799 | PSPH         | phosphoserine phosphatase                                        |
| -1.795 | FBXO22       | F-box protein 22                                                 |
| -1.794 | ITGBL1       | integrin subunit beta like 1                                     |
| -1.793 | EMX2         | empty spiracles homeobox 2                                       |
| -1.793 | SLC35A2      | solute carrier family 35 member A2                               |

|        |           |                                                         |
|--------|-----------|---------------------------------------------------------|
| -1.791 | STK38     | serine/threonine kinase 38                              |
| -1.79  | GAB1      | GRB2 associated binding protein 1                       |
| -1.786 | STAT3     | signal transducer and activator of transcription 3      |
| -1.783 | ATP11B    | ATPase phospholipid transporting 11B (putative)         |
| -1.771 | ERVK13-1  | endogenous retrovirus group K13 member 1                |
| -1.768 | TPP1      | tripeptidyl peptidase 1                                 |
| -1.764 | ZFAS1     | ZNFX1 antisense RNA 1                                   |
| -1.763 | NARF      | nuclear prelamin A recognition factor                   |
| -1.762 | FBXL4     | F-box and leucine rich repeat protein 4                 |
| -1.759 | ING3      | inhibitor of growth family member 3                     |
| -1.752 | C6orf89   | chromosome 6 open reading frame 89                      |
| -1.752 | ID3       | inhibitor of DNA binding 3, HLH protein                 |
| -1.748 | SHROOM3   | shroom family member 3                                  |
| -1.744 | RNF217    | ring finger protein 217                                 |
| -1.741 | DPY19L4   | dpy-19 like 4                                           |
| -1.741 | ZC3HAV1L  | zinc finger CCCH-type containing, antiviral 1 like      |
| -1.74  | TNFRSF11B | TNF receptor superfamily member 11b                     |
| -1.739 | MSL3      | MSL complex subunit 3                                   |
| -1.737 | MDM1      | Mdm1 nuclear protein                                    |
| -1.737 | TRIM45    | tripartite motif containing 45                          |
| -1.736 | EPS15     | epidermal growth factor receptor pathway substrate 15   |
| -1.735 | HNMT      | histamine N-methyltransferase                           |
| -1.734 | ANKRD36B  | ankyrin repeat domain 36B                               |
| -1.734 | CCPG1     | cell cycle progression 1                                |
| -1.733 | MEX3A     | mex-3 RNA binding family member A                       |
| -1.728 | TTC30B    | tetratricopeptide repeat domain 30B                     |
| -1.726 | SULT1A1   | sulfotransferase family 1A member 1                     |
| -1.722 | PRKD1     | protein kinase D1                                       |
| -1.721 | SUDS3     | SDS3 homolog, SIN3A corepressor complex component       |
| -1.719 | GEMIN2    | gem nuclear organelle associated protein 2              |
| -1.713 | SIKE1     | suppressor of IKBKE 1                                   |
| -1.702 | GRB10     | growth factor receptor bound protein 10                 |
| -1.702 | JMY       | junction mediating and regulatory protein, p53 cofactor |
| -1.702 | TMEM268   | transmembrane protein 268                               |
| -1.697 | ADCY4     | adenylate cyclase 4                                     |
| -1.691 | NUDT17    | nudix hydrolase 17                                      |
| -1.688 | EIF3M     | eukaryotic translation initiation factor 3 subunit M    |
| -1.686 | NAA40     | N-alpha-acetyltransferase 40, NatD catalytic subunit    |
| -1.684 | CELSR2    | cadherin EGF LAG seven-pass G-type receptor 2           |
| -1.684 | SKIL      | SKI like proto-oncogene                                 |
| -1.683 | CNTRL     | centriolin                                              |
| -1.683 | TTF2      | transcription termination factor 2                      |
| -1.68  | ZNFR846   | zinc finger protein 846                                 |
| -1.677 | TEP1      | telomerase associated protein 1                         |
| -1.677 | USP6      | ubiquitin specific peptidase 6                          |
| -1.677 | WDR59     | WD repeat domain 59                                     |
| -1.676 | TFCP2     | transcription factor CP2                                |
| -1.674 | LTV1      | LTV1 ribosome biogenesis factor                         |
| -1.673 | TMEM173   | stimulator of interferon response cGAMP interactor 1    |
| -1.672 | LOC283788 | FSHD region gene 1 pseudogene                           |
| -1.67  | ZNFR814   | zinc finger protein 814                                 |
| -1.669 | CCDC82    | coiled-coil domain containing 82                        |
| -1.669 | HOXC6     | homeobox C6                                             |
| -1.669 | LRIG2     | leucine rich repeats and immunoglobulin like domains 2  |
| -1.668 | BTF3L4    | basic transcription factor 3 like 4                     |
| -1.663 | TMEM56    | TLC domain containing 4                                 |
| -1.661 | GPR161    | G protein-coupled receptor 161                          |
| -1.661 | ZNFR506   | zinc finger protein 506                                 |
| -1.656 | TXNIP     | thioredoxin interacting protein                         |
| -1.655 | THAP6     | THAP domain containing 6                                |
| -1.654 | DHRS3     | dehydrogenase/reductase 3                               |
| -1.654 | ZFP90     | ZFP90 zinc finger protein                               |
| -1.648 | RRN3P3    | RRN3 pseudogene 3                                       |
| -1.644 | CGNL1     | cingulin like 1                                         |
| -1.642 | SPATA7    | spermatogenesis associated 7                            |
| -1.641 | SMAD6     | SMAD family member 6                                    |
| -1.641 | TUG1      | taurine up-regulated 1                                  |
| -1.64  | SIAE      | sialic acid acetyltransferase                           |
| -1.638 | IDH2      | isocitrate dehydrogenase (NADP(+)) 2                    |
| -1.637 | PHC1      | polyhomeotic homolog 1                                  |
| -1.637 | RSRP1     | arginine and serine rich protein 1                      |

|        |              |                                                                 |
|--------|--------------|-----------------------------------------------------------------|
| -1.633 | IBTK         | inhibitor of Bruton tyrosine kinase                             |
| -1.633 | TMCC1        | transmembrane and coiled-coil domain family 1                   |
| -1.632 | GSK3B        | glycogen synthase kinase 3 beta                                 |
| -1.632 | METTL15      | methyltransferase like 15                                       |
| -1.632 | ZMYM2        | zinc finger MYM-type containing 2                               |
| -1.625 | CSAD         | cysteine sulfinic acid decarboxylase                            |
| -1.625 | GABRR2       | gamma-aminobutyric acid type A receptor subunit rho2            |
| -1.62  | ARHGAP26     | Rho GTPase activating protein 26                                |
| -1.62  | FAM76B       | family with sequence similarity 76 member B                     |
| -1.62  | ZNF91        | zinc finger protein 91                                          |
| -1.618 | C9orf64      | chromosome 9 open reading frame 64                              |
| -1.617 | CARS         | cysteinyl-tRNA synthetase 1                                     |
| -1.617 | NNMT         | nicotinamide N-methyltransferase                                |
| -1.616 | CCDC80       | coiled-coil domain containing 80                                |
| -1.614 | SPARC        | secreted protein acidic and cysteine rich                       |
| -1.613 | RAB27A       | RAB27A, member RAS oncogene family                              |
| -1.613 | SDC2         | syndecan 2                                                      |
| -1.608 | NFYB         | nuclear transcription factor Y subunit beta                     |
| -1.607 | ZNF805       | zinc finger protein 805                                         |
| -1.604 | SESTD1       | SEC14 and spectrin domain containing 1                          |
| -1.603 | LPP          | LIM domain containing preferred translocation partner in lipoma |
| -1.603 | ZNF826P      | zinc finger protein 826, pseudogene                             |
| -1.602 | SETD1B       | SET domain containing 1B, histone lysine methyltransferase      |
| -1.6   | THNSL1       | threonine synthase like 1                                       |
| -1.598 | LOC101928230 | uncharacterized LOC101928230                                    |
| -1.597 | AMACR        | alpha-methylacyl-CoA racemase                                   |
| -1.595 | ERP44        | endoplasmic reticulum protein 44                                |
| -1.595 | LRRFIP1      | LRR binding FLII interacting protein 1                          |
| -1.593 | DAAM1        | dishevelled associated activator of morphogenesis 1             |
| -1.593 | PELI1        | pellino E3 ubiquitin protein ligase 1                           |
| -1.593 | TSHZ1        | teashirt zinc finger homeobox 1                                 |
| -1.59  | RWDD3        | RWD domain containing 3                                         |
| -1.588 | ZNF585A      | zinc finger protein 585A                                        |
| -1.585 | DPH5         | diphthamide biosynthesis 5                                      |
| -1.585 | XBP1         | X-box binding protein 1                                         |
| -1.584 | CD200        | CD200 molecule                                                  |
| -1.584 | STRBP        | spermatid perinuclear RNA binding protein                       |
| -1.579 | RUNX1T1      | RUNX1 partner transcriptional co-repressor 1                    |
| -1.578 | DOCK9        | dedicator of cytokinesis 9                                      |
| -1.578 | ZNF701       | zinc finger protein 701                                         |
| -1.576 | TRAPPC10     | trafficking protein particle complex 10                         |
| -1.575 | PPP6R2       | protein phosphatase 6 regulatory subunit 2                      |
| -1.575 | ZFH3         | zinc finger homeobox 3                                          |
| -1.575 | ZNF573       | zinc finger protein 573                                         |
| -1.57  | ANTXR1       | ANTXR cell adhesion molecule 1                                  |
| -1.57  | NFIB         | nuclear factor I B                                              |
| -1.568 | C11orf87     | chromosome 11 open reading frame 87                             |
| -1.568 | CC2D2A       | coiled-coil and C2 domain containing 2A                         |
| -1.566 | TBL1X        | transducin beta like 1 X-linked                                 |
| -1.565 | FLI1         | Fli-1 proto-oncogene, ETS transcription factor                  |
| -1.562 | ACTA2        | actin alpha 2, smooth muscle                                    |
| -1.562 | C11orf80     | chromosome 11 open reading frame 80                             |
| -1.556 | PER3         | period circadian regulator 3                                    |
| -1.553 | QKI          | QKI, KH domain containing RNA binding                           |
| -1.552 | GID4         | GID complex subunit 4 homolog                                   |
| -1.551 | NCBP3        | nuclear cap binding subunit 3                                   |
| -1.551 | NDUFB1       | NADH:ubiquinone oxidoreductase subunit B1                       |
| -1.551 | ZNF260       | zinc finger protein 260                                         |
| -1.548 | CLDN1        | claudin 1                                                       |
| -1.547 | ARID4A       | AT-rich interaction domain 4A                                   |
| -1.547 | BBS7         | Bardet-Biedl syndrome 7                                         |
| -1.546 | RAB11FIP1    | RAB11 family interacting protein 1                              |
| -1.546 | TEAD3        | TEA domain transcription factor 3                               |
| -1.545 | EIF4EBP1     | eukaryotic translation initiation factor 4E binding protein 1   |
| -1.544 | CPEB3        | cytoplasmic polyadenylation element binding protein 3           |
| -1.542 | CEBPG        | CCAAT enhancer binding protein gamma                            |
| -1.542 | MTERF2       | mitochondrial transcription termination factor 2                |
| -1.541 | LOC101929398 | uncharacterized LOC101929398                                    |
| -1.539 | TGIF1        | TGFB induced factor homeobox 1                                  |
| -1.538 | CFAP97       | cilia and flagella associated protein 97                        |
| -1.537 | NEU3         | neuraminidase 3                                                 |



|        |           |                                                                  |
|--------|-----------|------------------------------------------------------------------|
| -1.534 | CMIP      | c-Maf inducing protein                                           |
| -1.533 | JAK3      | Janus kinase 3                                                   |
| -1.532 | DBT       | dihydrolipoamide branched chain transacylase E2                  |
| -1.532 | DDX23     | DEAD-box helicase 23                                             |
| -1.532 | TBC1D8B   | TBC1 domain family member 8B                                     |
| -1.531 | TRIM8     | tripartite motif containing 8                                    |
| -1.528 | CNOT2     | CCR4-NOT transcription complex subunit 2                         |
| -1.528 | ZNF25     | zinc finger protein 25                                           |
| -1.527 | TFDP2     | transcription factor Dp-2                                        |
| -1.526 | LINC00969 | MIR570 host gene                                                 |
| -1.525 | NOD1      | nucleotide binding oligomerization domain containing 1           |
| -1.524 | CLIC4     | chloride intracellular channel 4                                 |
| -1.523 | NBPF3     | NBPF member 3                                                    |
| -1.521 | TCFL5     | transcription factor like 5                                      |
| -1.52  | ZNF311    | zinc finger protein 311                                          |
| -1.519 | ALKBH8    | alkB homolog 8, tRNA methyltransferase                           |
| -1.519 | COA1      | cytochrome c oxidase assembly factor 1 homolog                   |
| -1.519 | KAZN      | kazrin, periplakin interacting protein                           |
| -1.518 | ZNF416    | zinc finger protein 416                                          |
| -1.517 | BRD4      | bromodomain containing 4                                         |
| -1.517 | CREB1     | cAMP responsive element binding protein 1                        |
| -1.517 | ITPR1     | inositol 1,4,5-trisphosphate receptor type 1                     |
| -1.517 | PLEKHM3   | pleckstrin homology domain containing M3                         |
| -1.516 | ZNF785    | zinc finger protein 785                                          |
| -1.515 | ADAMTS2   | ADAM metalloproteinase with thrombospondin type 1 motif 2        |
| -1.515 | SARS      | seryl-tRNA synthetase 1                                          |
| -1.514 | PSMC2     | proteasome 26S subunit, ATPase 2                                 |
| -1.511 | DVL3      | dishevelled segment polarity protein 3                           |
| -1.51  | CNNM3     | cyclin and CBS domain divalent metal cation transport mediator 3 |
| -1.509 | MBOAT2    | membrane bound O-acyltransferase domain containing 2             |
| -1.509 | NAPB      | NSF attachment protein beta                                      |
| -1.509 | USP28     | ubiquitin specific peptidase 28                                  |
| -1.509 | USP53     | ubiquitin specific peptidase 53                                  |
| -1.508 | ZNF284    | zinc finger protein 284                                          |
| -1.507 | ASXL2     | ASXL transcriptional regulator 2                                 |
| -1.507 | IMPACT    | impact RWD domain protein                                        |
| -1.507 | KBTD7     | kelch repeat and BTB domain containing 7                         |
| -1.506 | TNRC6B    | trinucleotide repeat containing adaptor 6B                       |
| -1.505 | EFCAB2    | EF-hand calcium binding domain 2                                 |
| -1.504 | EFS       | embryonal Fyn-associated substrate                               |
| -1.502 | CENPP     | centromere protein P                                             |
| -1.502 | SLC10A7   | solute carrier family 10 member 7                                |
| -1.501 | FCF1      | FCF1 rRNA-processing protein                                     |
| -1.501 | OIP5-AS1  | OIP5 antisense RNA 1                                             |

**Table S3. So-specific up-regulated genes (>1.5-fold)**

© 2000-2020 QIAGEN. All rights reserved.

| Expr Fold Change | ID        | Entrez Gene Name                                                                |
|------------------|-----------|---------------------------------------------------------------------------------|
| 2.356            | LSS       | lanosterol synthase                                                             |
| 2.122            | EGR3      | early growth response 3                                                         |
| 2.107            | CD74      | CD74 molecule                                                                   |
| 2.038            | COLEC12   | collectin subfamily member 12                                                   |
| 1.967            | SMIM10    | small integral membrane protein 10                                              |
| 1.919            | HOMER3    | homer scaffold protein 3                                                        |
| 1.886            | LINC00342 | long intergenic non-protein coding RNA 342                                      |
| 1.878            | SORL1     | sortilin related receptor 1                                                     |
| 1.867            | BCAS4     | breast carcinoma amplified sequence 4                                           |
| 1.848            | GEM       | GTP binding protein overexpressed in skeletal muscle                            |
| 1.792            | ZAR1      | zygote arrest 1                                                                 |
| 1.79             | UEVLD     | UEV and lactate/malate dehydrogenase domains                                    |
| 1.757            | RASSF3    | Ras association domain family member 3                                          |
| 1.754            | MOB3C     | MOB kinase activator 3C                                                         |
| 1.722            | KLHL36    | kelch like family member 36                                                     |
| 1.698            | PCOTH     | Pro-X-Gly collagen triple helix like repeat containing                          |
| 1.696            | FAM129B   | niban apoptosis regulator 2                                                     |
| 1.687            | PLEKHG5   | pleckstrin homology and RhoGEF domain containing G5                             |
| 1.683            | COPS6     | COP9 signalosome subunit 6                                                      |
| 1.673            | DYNC1L12  | dynein cytoplasmic 1 light intermediate chain 2                                 |
| 1.654            | PLK3      | polo like kinase 3                                                              |
| 1.649            | METTL7A   | methyltransferase like 7A                                                       |
| 1.642            | HLA-DMB   | major histocompatibility complex, class II, DM beta                             |
| 1.641            | FAM225B   | family with sequence similarity 225 member B                                    |
| 1.637            | KCNMA1    | potassium calcium-activated channel subfamily M alpha 1                         |
| 1.621            | DPP9      | dipeptidyl peptidase 9                                                          |
| 1.621            | SIKE1     | suppressor of IKBKE 1                                                           |
| 1.616            | GGCX      | gamma-glutamyl carboxylase                                                      |
| 1.61             | USP12     | ubiquitin specific peptidase 12                                                 |
| 1.603            | MED27     | mediator complex subunit 27                                                     |
| 1.602            | ANAPC2    | anaphase promoting complex subunit 2                                            |
| 1.596            | DNAL11    | dynein axonemal light intermediate chain 1                                      |
| 1.595            | MOCS2     | molybdenum cofactor synthesis 2                                                 |
| 1.59             | IDH3B     | isocitrate dehydrogenase (NAD(+)) 3 non-catalytic subunit beta                  |
| 1.585            | RIOK2     | RIO kinase 2                                                                    |
| 1.577            | HGF       | hepatocyte growth factor                                                        |
| 1.577            | TMEM63B   | transmembrane protein 63B                                                       |
| 1.576            | SOCS5     | suppressor of cytokine signaling 5                                              |
| 1.574            | ERAP2     | endoplasmic reticulum aminopeptidase 2                                          |
| 1.57             | AGPAT3    | 1-acylglycerol-3-phosphate O-acyltransferase 3                                  |
| 1.555            | CCBE1     | collagen and calcium binding EGF domains 1                                      |
| 1.546            | CUL7      | cullin 7                                                                        |
| 1.546            | SMIM3     | small integral membrane protein 3                                               |
| 1.545            | MRPS18B   | mitochondrial ribosomal protein S18B                                            |
| 1.545            | MT1HL1    | metallothionein 1H like 1                                                       |
| 1.54             | IRAK2     | interleukin 1 receptor associated kinase 2                                      |
| 1.539            | NIPAL3    | NIPA like domain containing 3                                                   |
| 1.538            | CARHSP1   | calcium regulated heat stable protein 1                                         |
| 1.535            | SIVA1     | SIVA1 apoptosis inducing factor                                                 |
| 1.529            | PRMT1     | protein arginine methyltransferase 1                                            |
| 1.527            | IRF2      | interferon regulatory factor 2                                                  |
| 1.524            | AKT1S1    | AKT1 substrate 1                                                                |
| 1.523            | ZNF252P   | zinc finger protein 252, pseudogene                                             |
| 1.522            | EEF1E1    | eukaryotic translation elongation factor 1 epsilon 1                            |
| 1.52             | GAR1      | GAR1 ribonucleoprotein                                                          |
| 1.52             | SAMHD1    | SAM and HD domain containing deoxynucleoside triphosphate triphosphohydrolase 1 |
| 1.517            | NAGK      | N-acetylglucosamine kinase                                                      |
| 1.516            | TNPO3     | transportin 3                                                                   |
| 1.511            | MAP4K4    | mitogen-activated protein kinase kinase kinase kinase 4                         |
| 1.51             | SLC14A1   | solute carrier family 14 member 1 (Kidd blood group)                            |
| 1.509            | COX16     | cytochrome c oxidase assembly factor COX16                                      |
| 1.504            | NET1      | neuroepithelial cell transforming 1                                             |
| 1.501            | TRAPPC2L  | trafficking protein particle complex 2 like                                     |

**Table S3. continued. So-specific down-regulated genes (<0.67-fold)**

| Expr Fold Change | ID         | Entrez Gene Name                                          |
|------------------|------------|-----------------------------------------------------------|
| -3.331           | MKX        | mohawk homeobox                                           |
| -2.802           | EIF3CL     | eukaryotic translation initiation factor 3 subunit C like |
| -2.774           | WAC        | WW domain containing adaptor with coiled-coil             |
| -2.667           | DLEU2      | deleted in lymphocytic leukemia 2                         |
| -2.653           | CRIPT      | CXXC repeat containing interactor of PDZ3 domain          |
| -2.535           | MYOCD      | myocardin                                                 |
| -2.475           | LINC00597  | long intergenic non-protein coding RNA 597                |
| -2.413           | RAB3GAP2   | RAB3 GTPase activating non-catalytic protein subunit 2    |
| -2.322           | SBF2       | SET binding factor 2                                      |
| -2.296           | RUFY2      | RUN and FYVE domain containing 2                          |
| -2.291           | TMEM43     | transmembrane protein 43                                  |
| -2.24            | SEC61B     | SEC61 translocon subunit beta                             |
| -2.173           | CBX3       | chromobox 3                                               |
| -2.139           | PRKAA1     | protein kinase AMP-activated catalytic subunit alpha 1    |
| -2.068           | AKAP9      | A-kinase anchoring protein 9                              |
| -2.056           | OSBP       | oxysterol binding protein                                 |
| -2.047           | BGN        | biglycan                                                  |
| -2.045           | EEF1A1     | eukaryotic translation elongation factor 1 alpha 1        |
| -2.028           | LOC145474  | uncharacterized LOC145474                                 |
| -2.027           | EPG5       | ectopic P-granules autophagy protein 5 homolog            |
| -2.025           | FLRT2      | fibronectin leucine rich transmembrane protein 2          |
| -2.017           | VPS8       | VPS8 subunit of CORVET complex                            |
| -2.009           | N4BP2L2    | NEDD4 binding protein 2 like 2                            |
| -2.008           | MDC1       | mediator of DNA damage checkpoint 1                       |
| -1.978           | EMC3       | ER membrane protein complex subunit 3                     |
| -1.977           | MALSU1     | mitochondrial assembly of ribosomal large subunit 1       |
| -1.947           | ZNF654     | zinc finger protein 654                                   |
| -1.94            | LINC00342  | long intergenic non-protein coding RNA 342                |
| -1.931           | KATNBL1    | katanin regulatory subunit B1 like 1                      |
| -1.922           | UBE2D3     | ubiquitin conjugating enzyme E2 D3                        |
| -1.921           | CTTN       | cortactin                                                 |
| -1.91            | PHC3       | polyhomeotic homolog 3                                    |
| -1.897           | SENP7      | SUMO specific peptidase 7                                 |
| -1.858           | FN1        | fibronectin 1                                             |
| -1.843           | EWSR1      | EWS RNA binding protein 1                                 |
| -1.843           | MTHFSD     | methenyltetrahydrofolate synthetase domain containing     |
| -1.838           | DDX11      | DEAD/H-box helicase 11                                    |
| -1.838           | WDR33      | WD repeat domain 33                                       |
| -1.829           | ITPR2      | inositol 1,4,5-trisphosphate receptor type 2              |
| -1.817           | FGF14      | fibroblast growth factor 14                               |
| -1.804           | IGDCC4     | immunoglobulin superfamily DCC subclass member 4          |
| -1.79            | SPATS2L    | spermatogenesis associated serine rich 2 like             |
| -1.77            | FRMD6-AS1  | FRMD6 antisense RNA 1                                     |
| -1.769           | SEC14L1P1  | SEC14 like 1 pseudogene 1                                 |
| -1.762           | COL7A1     | collagen type VII alpha 1 chain                           |
| -1.755           | TMEM154    | transmembrane protein 154                                 |
| -1.744           | ZNF117     | zinc finger protein 117                                   |
| -1.729           | PRPF38B    | pre-mRNA processing factor 38B                            |
| -1.722           | CCDC18-AS1 | CCDC18 antisense RNA 1                                    |
| -1.712           | RNF34      | ring finger protein 34                                    |
| -1.71            | FAM84A     | LRAT domain containing 1                                  |
| -1.708           | TXLNGY     | taxilin gamma pseudogene, Y-linked                        |
| -1.706           | CLHC1      | clathrin heavy chain linker domain containing 1           |
| -1.703           | PHF11      | PHD finger protein 11                                     |
| -1.699           | RPS10P2    | ribosomal protein S10 pseudogene 2                        |
| -1.69            | RUFY3      | RUN and FYVE domain containing 3                          |
| -1.69            | SSH3       | slingshot protein phosphatase 3                           |
| -1.689           | LRP1       | LDL receptor related protein 1                            |
| -1.675           | KMT2D      | lysine methyltransferase 2D                               |
| -1.675           | LOC114224  | uncharacterized LOC114224                                 |
| -1.674           | KLF2       | Kruppel like factor 2                                     |
| -1.672           | KCTD16     | potassium channel tetramerization domain containing 16    |
| -1.671           | FNBP4      | formin binding protein 4                                  |
| -1.663           | ITPK1-AS1  | ITPK1 antisense RNA 1                                     |
| -1.66            | AFG3L1P    | AFG3 like matrix AAA peptidase subunit 1, pseudogene      |
| -1.659           | SNX25      | sorting nexin 25                                          |
| -1.643           | WDR1       | WD repeat domain 1                                        |
| -1.639           | FZD1       | frizzled class receptor 1                                 |

|        |          |                                                                            |
|--------|----------|----------------------------------------------------------------------------|
| -1.639 | TEAD2    | TEA domain transcription factor 2                                          |
| -1.636 | STK35    | serine/threonine kinase 35                                                 |
| -1.635 | AGO3     | argonaute RISC catalytic component 3                                       |
| -1.632 | TRIM4    | tripartite motif containing 4                                              |
| -1.63  | MRPS25   | mitochondrial ribosomal protein S25                                        |
| -1.625 | SMC6     | structural maintenance of chromosomes 6                                    |
| -1.614 | TRA2A    | transformer 2 alpha homolog                                                |
| -1.61  | SESN2    | sestrin 2                                                                  |
| -1.61  | ZBTB7A   | zinc finger and BTB domain containing 7A                                   |
| -1.609 | RTN4     | reticulon 4                                                                |
| -1.606 | PRPF4B   | pre-mRNA processing factor 4B                                              |
| -1.601 | IGF1R    | insulin like growth factor 1 receptor                                      |
| -1.596 | ATP9B    | ATPase phospholipid transporting 9B (putative)                             |
| -1.584 | TMED5    | transmembrane p24 trafficking protein 5                                    |
| -1.584 | TPM4     | tropomyosin 4                                                              |
| -1.581 | C6orf62  | chromosome 6 open reading frame 62                                         |
| -1.581 | RAVER2   | ribonucleoprotein, PTB binding 2                                           |
| -1.577 | C8orf59  | ribosomal biogenesis factor                                                |
| -1.576 | RNF216   | ring finger protein 216                                                    |
| -1.572 | BAG2     | BAG cochaperone 2                                                          |
| -1.571 | PPP1R9B  | protein phosphatase 1 regulatory subunit 9B                                |
| -1.569 | SFRP4    | secreted frizzled related protein 4                                        |
| -1.567 | PRKAR1A  | protein kinase cAMP-dependent type I regulatory subunit alpha              |
| -1.563 | FRY      | FRY microtubule binding protein                                            |
| -1.561 | ZBTB1    | zinc finger and BTB domain containing 1                                    |
| -1.555 | HDAC4    | histone deacetylase 4                                                      |
| -1.549 | TTBK2    | tau tubulin kinase 2                                                       |
| -1.545 | ZNF37BP  | zinc finger protein 37B, pseudogene                                        |
| -1.543 | GOPC     | golgi associated PDZ and coiled-coil motif containing                      |
| -1.539 | ANKRD13D | ankyrin repeat domain 13D                                                  |
| -1.539 | BANK1    | B cell scaffold protein with ankyrin repeats 1                             |
| -1.533 | SLC7A6   | solute carrier family 7 member 6                                           |
| -1.532 | TFG      | trafficking from ER to golgi regulator                                     |
| -1.531 | ACVR2A   | activin A receptor type 2A                                                 |
| -1.531 | TRAPPC2  | trafficking protein particle complex 2                                     |
| -1.529 | ANKRD44  | ankyrin repeat domain 44                                                   |
| -1.529 | FBLN5    | fibulin 5                                                                  |
| -1.527 | MAGI1    | membrane associated guanylate kinase, WW and PDZ domain containing 1       |
| -1.525 | MICAL3   | microtubule associated monooxygenase, calponin and LIM domain containing 3 |
| -1.525 | SAMD4B   | sterile alpha motif domain containing 4B                                   |
| -1.516 | LRPPRC   | leucine rich pentatricopeptide repeat containing                           |
| -1.502 | ZNF570   | zinc finger protein 570                                                    |

**Table S4. Selected genes for single cellular q-PCR analysis**

|    | Symbol   | description                                                        | Focused functions for the selection in single cellular qPCR |
|----|----------|--------------------------------------------------------------------|-------------------------------------------------------------|
| 1  | APC      | APC Regulator Of WNT Signaling Pathway                             | Pt-specific upregulated                                     |
| 2  | DUSP6    | dual specificity phosphatase 6                                     | Pt-specific upregulated                                     |
| 3  | ADGRG1   | Adhesion G Protein-Coupled Receptor G1                             | Pt-specific upregulated                                     |
| 4  | IFNGR1   | Interferon Gamma Receptor 1 (CD119)                                | Pt-specific upregulated                                     |
| 5  | LPXN     | Leupaxin                                                           | Pt-specific upregulated                                     |
| 6  | IGF2BP3  | Insulin Like Growth Factor 2 mRNA Binding Protein 3                | Pt-specific upregulated                                     |
| 7  | PIK3C2A  | Phosphatidylinositol-4-Phosphate 3-Kinase Catalytic Subunit Type 2 | Pt-specific upregulated                                     |
| 8  | DUSP4    | dual specificity phosphatase 4                                     | Pt-specific upregulated                                     |
| 9  | MFN2     | Mitofusin 2                                                        | Pt-specific upregulated                                     |
| 10 | POU5F1   | POU Class 5 Homeobox 1 (Oct4)                                      | Pluripotency                                                |
| 11 | ISLR     | Immunoglobulin Superfamily Containing Leucine Rich Repeat (meflin) | Stemness marker of MSCs                                     |
| 12 | KITLG    | KIT ligand (SCF)                                                   | Hematopoiesis                                               |
| 13 | EGF      | Epidermal Growth Factor                                            | Cell growth & differentiation                               |
| 14 | GNL3     | G Protein Nucleolar 3 (nucleostemin)                               | Cell-cycle progression                                      |
| 15 | MKI67    | marker of Ki67                                                     | Cell-cycle progression                                      |
| 16 | COL1A1   | Collagen Type I Alpha 1 Chain                                      | Cell adhesion                                               |
| 17 | RUNX2    | RUNX Family Transcription Factor 2                                 | Osteogenic differentiation related                          |
| 18 | ALP      | alkaline phosphatase                                               | Osteogenic differentiation related/Stemness of MSC          |
| 19 | TLR1     | Toll Like Receptor 1                                               | Immunomodulator                                             |
| 20 | TLR3     | Toll Like Receptor 3                                               | Immunomodulator                                             |
| 21 | TLR4     | Toll Like Receptor 4                                               | Immunomodulator                                             |
| 22 | TLR6     | Toll Like Receptor 6                                               | Immunomodulator                                             |
| 23 | IL-6     | Interleukin 6                                                      | Immunomodulator                                             |
| 24 | IL-8     | Interleukin8                                                       | Immunomodulator                                             |
| 25 | HGF      | Hepatocyte Growth Factor                                           | Tissue protection                                           |
| 26 | BDNF     | Brain Derived Neurotrophic Factor                                  | Tissue protection                                           |
| 27 | NGF      | Nerve GrowthFactor                                                 | Tissue protection                                           |
| 28 | NRG1     | neuregulin1                                                        | Tissue protection                                           |
| 29 | NPPB     | natriuretic peptide B (BNP)                                        | Tissue protection                                           |
| 30 | GDNF     | Glial Cell Derived Neurotrophic Factor                             | Tissue protection                                           |
| 31 | CSF3     | Colony Stimulating Factor 3 (G-CSF)                                | Tissue protection                                           |
| 32 | FGF2     | Fibroblast GrowthFactor 2                                          | Tissue protection/Angiogenesis                              |
| 33 | VEGFA    | Vascular Endothelial Growth Factor A                               | Tissue protection/Angiogenesis                              |
| 34 | IDO1     | Indoleamine 2,3-Dioxygenase 1                                      | Anti-inflammatory                                           |
| 35 | TNFRSF1A | TNF Receptor Superfamily Member 1A                                 | Anti-inflammatory                                           |
| 36 | TNFAIP6  | TNF Alpha Induced Protein 6 (TSG6)                                 | Anti-inflammatory                                           |
| 37 | ITGA4    | Integrin Subunit Alpha 4                                           | Migration to inflammatory site                              |
| 38 | ITGB1    | Integrin Subunit Beta 1                                            | Migration to inflammatory site                              |
| 39 | CXCR4    | C-X-C Motif Chemokine Receptor 4                                   | Migration to inflammatory site                              |
| 40 | MMP2     | Matrix Metalloproteinase 2                                         | Migration to inflammatory site                              |
| 41 | MMP9     | Matrix Metalloproteinase 9                                         | Migration to inflammatory site                              |
| 42 | MMP14    | Matrix Metalloproteinase 14                                        | Migration to inflammatory site                              |
| 43 | TIMP1    | TIMP Metalloproteinase Inhibitor 1                                 | Migration to inflammatory site                              |
| 44 | TIMP2    | TIMP Metalloproteinase Inhibitor 2                                 | Migration to inflammatory site                              |
| 45 | STC1     | Stanniocalcin 1                                                    | Anti-apoptosis                                              |
| 46 | HPRT1    | Hypoxanthine Phosphoribosyltransferase 1                           | House keeping                                               |
| 47 | RNA18S1  | 18S ribosomal 1                                                    | House keeping                                               |
| 48 | RPL13A   | Ribosomal Protein L13A                                             | House keeping                                               |
